# Supplementary material for: Reverse metabolomics for the discovery of chemical structures from humans
Source: Nature. Author manuscript; Available in PMC 2024 Mar 8. (PMC10849969; doi:10.1038/s41586-023-06906-8)
Supplement: TableS7 [file NIHMS1962612-supplement-TableS7.csv]

Bile Acid	HMP Species Name	median	mean	max	min	SD
Ala-CA	Actinomyces viscosus	0	0	0	0	0
Ala-CA	Bacteroides caccae	0	0	0	0	0
Ala-CA	Bacteroides cellulosilyticus	0	0	0	0	0
Ala-CA	Bacteroides dorei	0	0	0	0	0
Ala-CA	Bacteroides eggerthii	0	0	0	0	0
Ala-CA	Bacteroides finegoldii	0	0	0	0	0
Ala-CA	Bacteroides fragilis	0	0	0	0	0
Ala-CA	Bacteroides ovatus	0	0	0	0	0
Ala-CA	Bacteroides salyersiae	0	0	0	0	0
Ala-CA	Bacteroides stercoris	0	0	0	0	0
Ala-CA	Bacteroides vulgatus	0	0	0	0	0
Ala-CA	Bifidobacterium adolescentis	0	1424.854667	4274.564	0	2467.920676
Ala-CA	Bifidobacterium angulatum	0	1511.357667	4534.073	0	2617.748267
Ala-CA	Bifidobacterium breve	0	0	0	0	0
Ala-CA	Bifidobacterium longum	0	0	0	0	0
Ala-CA	Catabacter hongkongensis	0	0	0	0	0
Ala-CA	Cellulosilyticum lentocellum	0	0	0	0	0
Ala-CA	Clostridiales bacterium oral taxon 876	0	0	0	0	0
Ala-CA	Clostridium aldenense	0	0	0	0	0
Ala-CA	Clostridium cadaveris	0	42838.637	136995.45	0	66581.66565
Ala-CA	Clostridium symbiosum	0	0	0	0	0
Ala-CA	Cutibacterium acnes	0	0	0	0	0
Ala-CA	Enterococcus faecalis	0	0	0	0	0
Ala-CA	Enterococcus faecium	0	1027.624619	8128.238	0	2346.301788
Ala-CA	Finegoldia magna	0	0	0	0	0
Ala-CA	Flavonifractor plautii	0	0	0	0	0
Ala-CA	Fusobacterium nucleatum	0	0	0	0	0
Ala-CA	Fusobacterium periodonticum	0	0	0	0	0
Ala-CA	Fusobacterium ulcerans	0	0	0	0	0
Ala-CA	Gardnerella vaginalis	0	0	0	0	0
Ala-CA	Lachnospiraceae bacterium oral taxon 500	0	1921.94	5765.82	0	3328.897729
Ala-CA	Lactobacillus gasseri	0	0	0	0	0
Ala-CA	Lactobacillus jensenii	0	0	0	0	0
Ala-CA	Lactobacillus vaginalis	0	0	0	0	0
Ala-CA	Mobiluncus mulieris	0	0	0	0	0
Ala-CA	Olsenella sp. oral taxon 809	0	0	0	0	0
Ala-CA	Oribacterium sinus	0	0	0	0	0
Ala-CA	Parabacteroides	0	0	0	0	0
Ala-CA	Parabacteroides goldsteinii	0	0	0	0	0
Ala-CA	Parabacteroides johnsonii	0	0	0	0	0
Ala-CA	Parabacteroides merdae	0	0	0	0	0
Ala-CA	Parvimonas micra	0	0	0	0	0
Ala-CA	Parvimonas sp. oral taxon 110	0	0	0	0	0
Ala-CA	Peptoniphilus lacrimalis	0	0	0	0	0
Ala-CA	Peptoniphilus sp. oral taxon 386	0	0	0	0	0
Ala-CA	Peptoniphilus sp. oral taxon 836	0	0	0	0	0
Ala-CA	Peptostreptococcus anaerobius	0	0	0	0	0
Ala-CA	Porphyromonas sp. oral taxon 278	0	0	0	0	0
Ala-CA	Prevotella amnii	0	0	0	0	0
Ala-CA	Prevotella bivia	0	0	0	0	0
Ala-CA	Prevotella buccae	0	0	0	0	0
Ala-CA	Prevotella denticola	0	0	0	0	0
Ala-CA	Prevotella disiens	0	0	0	0	0
Ala-CA	Prevotella histicola	0	0	0	0	0
Ala-CA	Prevotella melaninogenica	0	0	0	0	0
Ala-CA	Prevotella nigrescens	0	0	0	0	0
Ala-CA	Prevotella oralis	0	0	0	0	0
Ala-CA	Prevotella oris	0	0	0	0	0
Ala-CA	Prevotella sp. oral taxon 317	0	0	0	0	0
Ala-CA	Prevotella sp. oral taxon 472	0	0	0	0	0
Ala-CA	Prevotella timonensis	0	0	0	0	0
Ala-CA	Prevotella veroralis	0	0	0	0	0
Ala-CA	Propionibacterium acidifaciens	0	0	0	0	0
Ala-CA	Propionibacterium humerusii	0	0	0	0	0
Ala-CA	Pseudopropionibacterium propionicum	0	0	0	0	0
Ala-CA	Selenomonas noxia	0	0	0	0	0
Ala-CA	Sutterella wadsworthensis	0	0	0	0	0
Ala-CA	Treponema denticola	0	0	0	0	0
Ala-CA	unclassified Peptostreptococcaceae (miscellaneous)	0	0	0	0	0
Ala-CA	Veillonella montpellierensis	0	0	0	0	0
Ala-DCA	Actinomyces viscosus	0	0	0	0	0
Ala-DCA	Bacteroides caccae	0	0	0	0	0
Ala-DCA	Bacteroides cellulosilyticus	0	0	0	0	0
Ala-DCA	Bacteroides dorei	0	0	0	0	0
Ala-DCA	Bacteroides eggerthii	0	1351.002667	4053.008	0	2340.00526
Ala-DCA	Bacteroides finegoldii	0	0	0	0	0
Ala-DCA	Bacteroides fragilis	0	0	0	0	0
Ala-DCA	Bacteroides ovatus	0	0	0	0	0
Ala-DCA	Bacteroides salyersiae	0	0	0	0	0
Ala-DCA	Bacteroides stercoris	0	0	0	0	0
Ala-DCA	Bacteroides vulgatus	0	0	0	0	0
Ala-DCA	Bifidobacterium adolescentis	0	0	0	0	0
Ala-DCA	Bifidobacterium angulatum	0	0	0	0	0
Ala-DCA	Bifidobacterium breve	0	0	0	0	0
Ala-DCA	Bifidobacterium longum	0	0	0	0	0
Ala-DCA	Catabacter hongkongensis	0	0	0	0	0
Ala-DCA	Cellulosilyticum lentocellum	15829.417	11121.535	17535.188	0	9669.220198
Ala-DCA	Clostridiales bacterium oral taxon 876	0	0	0	0	0
Ala-DCA	Clostridium aldenense	0	1692.363667	5077.091	0	2931.259856
Ala-DCA	Clostridium cadaveris	0	14573.84967	49662.184	0	22888.19529
Ala-DCA	Clostridium symbiosum	5642.287	4488.236667	7822.423	0	4036.886118
Ala-DCA	Cutibacterium acnes	0	0	0	0	0
Ala-DCA	Enterococcus faecalis	0	0	0	0	0
Ala-DCA	Enterococcus faecium	4571.234	8170.741	34431.322	0	9858.685881
Ala-DCA	Finegoldia magna	0	0	0	0	0
Ala-DCA	Flavonifractor plautii	0	0	0	0	0
Ala-DCA	Fusobacterium nucleatum	0	586.3844667	4643.726	0	1550.251926
Ala-DCA	Fusobacterium periodonticum	0	0	0	0	0
Ala-DCA	Fusobacterium ulcerans	0	0	0	0	0
Ala-DCA	Gardnerella vaginalis	0	0	0	0	0
Ala-DCA	Lachnospiraceae bacterium oral taxon 500	4653.847	8584.481	21099.596	0	11085.38004
Ala-DCA	Lactobacillus gasseri	0	0	0	0	0
Ala-DCA	Lactobacillus jensenii	0	0	0	0	0
Ala-DCA	Lactobacillus vaginalis	0	0	0	0	0
Ala-DCA	Mobiluncus mulieris	0	0	0	0	0
Ala-DCA	Olsenella sp. oral taxon 809	0	0	0	0	0
Ala-DCA	Oribacterium sinus	0	0	0	0	0
Ala-DCA	Parabacteroides	0	0	0	0	0
Ala-DCA	Parabacteroides goldsteinii	0	0	0	0	0
Ala-DCA	Parabacteroides johnsonii	0	0	0	0	0
Ala-DCA	Parabacteroides merdae	0	0	0	0	0
Ala-DCA	Parvimonas micra	0	0	0	0	0
Ala-DCA	Parvimonas sp. oral taxon 110	0	0	0	0	0
Ala-DCA	Peptoniphilus lacrimalis	0	0	0	0	0
Ala-DCA	Peptoniphilus sp. oral taxon 386	0	0	0	0	0
Ala-DCA	Peptoniphilus sp. oral taxon 836	0	2563.598667	7690.796	0	4440.283141
Ala-DCA	Peptostreptococcus anaerobius	0	0	0	0	0
Ala-DCA	Porphyromonas sp. oral taxon 278	0	0	0	0	0
Ala-DCA	Prevotella amnii	0	0	0	0	0
Ala-DCA	Prevotella bivia	0	0	0	0	0
Ala-DCA	Prevotella buccae	0	0	0	0	0
Ala-DCA	Prevotella denticola	0	0	0	0	0
Ala-DCA	Prevotella disiens	0	0	0	0	0
Ala-DCA	Prevotella histicola	0	0	0	0	0
Ala-DCA	Prevotella melaninogenica	0	0	0	0	0
Ala-DCA	Prevotella nigrescens	0	0	0	0	0
Ala-DCA	Prevotella oralis	0	0	0	0	0
Ala-DCA	Prevotella oris	0	0	0	0	0
Ala-DCA	Prevotella sp. oral taxon 317	0	0	0	0	0
Ala-DCA	Prevotella sp. oral taxon 472	0	0	0	0	0
Ala-DCA	Prevotella timonensis	0	0	0	0	0
Ala-DCA	Prevotella veroralis	0	0	0	0	0
Ala-DCA	Propionibacterium acidifaciens	0	0	0	0	0
Ala-DCA	Propionibacterium humerusii	0	0	0	0	0
Ala-DCA	Pseudopropionibacterium propionicum	0	0	0	0	0
Ala-DCA	Selenomonas noxia	0	0	0	0	0
Ala-DCA	Sutterella wadsworthensis	0	0	0	0	0
Ala-DCA	Treponema denticola	0	0	0	0	0
Ala-DCA	unclassified Peptostreptococcaceae (miscellaneous)	0	0	0	0	0
Ala-DCA	Veillonella montpellierensis	0	0	0	0	0
Arg-CA	Actinomyces viscosus	0	0	0	0	0
Arg-CA	Bacteroides caccae	0	0	0	0	0
Arg-CA	Bacteroides cellulosilyticus	0	0	0	0	0
Arg-CA	Bacteroides dorei	0	0	0	0	0
Arg-CA	Bacteroides eggerthii	0	0	0	0	0
Arg-CA	Bacteroides finegoldii	0	0	0	0	0
Arg-CA	Bacteroides fragilis	0	0	0	0	0
Arg-CA	Bacteroides ovatus	0	0	0	0	0
Arg-CA	Bacteroides salyersiae	0	0	0	0	0
Arg-CA	Bacteroides stercoris	0	0	0	0	0
Arg-CA	Bacteroides vulgatus	0	0	0	0	0
Arg-CA	Bifidobacterium adolescentis	5509.63	3938.719333	6306.528	0	3434.223944
Arg-CA	Bifidobacterium angulatum	0	4188.340667	12565.022	0	7254.418834
Arg-CA	Bifidobacterium breve	0	2175.161417	11327.956	0	4202.758798
Arg-CA	Bifidobacterium longum	0	1757.548417	10517.695	0	3434.649266
Arg-CA	Catabacter hongkongensis	0	0	0	0	0
Arg-CA	Cellulosilyticum lentocellum	0	0	0	0	0
Arg-CA	Clostridiales bacterium oral taxon 876	0	0	0	0	0
Arg-CA	Clostridium aldenense	0	0	0	0	0
Arg-CA	Clostridium cadaveris	0	0	0	0	0
Arg-CA	Clostridium symbiosum	0	0	0	0	0
Arg-CA	Cutibacterium acnes	0	0	0	0	0
Arg-CA	Enterococcus faecalis	0	0	0	0	0
Arg-CA	Enterococcus faecium	0	0	0	0	0
Arg-CA	Finegoldia magna	0	0	0	0	0
Arg-CA	Flavonifractor plautii	0	844.7725	5068.635	0	2069.261574
Arg-CA	Fusobacterium nucleatum	0	0	0	0	0
Arg-CA	Fusobacterium periodonticum	0	0	0	0	0
Arg-CA	Fusobacterium ulcerans	0	0	0	0	0
Arg-CA	Gardnerella vaginalis	0	0	0	0	0
Arg-CA	Lachnospiraceae bacterium oral taxon 500	0	0	0	0	0
Arg-CA	Lactobacillus gasseri	0	0	0	0	0
Arg-CA	Lactobacillus jensenii	0	0	0	0	0
Arg-CA	Lactobacillus vaginalis	0	0	0	0	0
Arg-CA	Mobiluncus mulieris	0	0	0	0	0
Arg-CA	Olsenella sp. oral taxon 809	0	0	0	0	0
Arg-CA	Oribacterium sinus	0	0	0	0	0
Arg-CA	Parabacteroides	0	0	0	0	0
Arg-CA	Parabacteroides goldsteinii	0	0	0	0	0
Arg-CA	Parabacteroides johnsonii	0	0	0	0	0
Arg-CA	Parabacteroides merdae	0	0	0	0	0
Arg-CA	Parvimonas micra	0	0	0	0	0
Arg-CA	Parvimonas sp. oral taxon 110	0	0	0	0	0
Arg-CA	Peptoniphilus lacrimalis	0	0	0	0	0
Arg-CA	Peptoniphilus sp. oral taxon 386	0	0	0	0	0
Arg-CA	Peptoniphilus sp. oral taxon 836	0	0	0	0	0
Arg-CA	Peptostreptococcus anaerobius	0	0	0	0	0
Arg-CA	Porphyromonas sp. oral taxon 278	0	0	0	0	0
Arg-CA	Prevotella amnii	0	0	0	0	0
Arg-CA	Prevotella bivia	0	0	0	0	0
Arg-CA	Prevotella buccae	0	0	0	0	0
Arg-CA	Prevotella denticola	0	0	0	0	0
Arg-CA	Prevotella disiens	0	0	0	0	0
Arg-CA	Prevotella histicola	0	0	0	0	0
Arg-CA	Prevotella melaninogenica	0	0	0	0	0
Arg-CA	Prevotella nigrescens	0	0	0	0	0
Arg-CA	Prevotella oralis	0	0	0	0	0
Arg-CA	Prevotella oris	0	0	0	0	0
Arg-CA	Prevotella sp. oral taxon 317	0	0	0	0	0
Arg-CA	Prevotella sp. oral taxon 472	0	0	0	0	0
Arg-CA	Prevotella timonensis	0	0	0	0	0
Arg-CA	Prevotella veroralis	0	0	0	0	0
Arg-CA	Propionibacterium acidifaciens	0	0	0	0	0
Arg-CA	Propionibacterium humerusii	0	0	0	0	0
Arg-CA	Pseudopropionibacterium propionicum	0	0	0	0	0
Arg-CA	Selenomonas noxia	0	0	0	0	0
Arg-CA	Sutterella wadsworthensis	0	0	0	0	0
Arg-CA	Treponema denticola	0	0	0	0	0
Arg-CA	unclassified Peptostreptococcaceae (miscellaneous)	0	0	0	0	0
Arg-CA	Veillonella montpellierensis	0	0	0	0	0
Arg-DCA	Actinomyces viscosus	0	0	0	0	0
Arg-DCA	Bacteroides caccae	7541.747	6464.265	11851.048	0	5998.546513
Arg-DCA	Bacteroides cellulosilyticus	0	0	0	0	0
Arg-DCA	Bacteroides dorei	0	0	0	0	0
Arg-DCA	Bacteroides eggerthii	0	0	0	0	0
Arg-DCA	Bacteroides finegoldii	0	0	0	0	0
Arg-DCA	Bacteroides fragilis	0	0	0	0	0
Arg-DCA	Bacteroides ovatus	0	0	0	0	0
Arg-DCA	Bacteroides salyersiae	0	0	0	0	0
Arg-DCA	Bacteroides stercoris	0	0	0	0	0
Arg-DCA	Bacteroides vulgatus	0	0	0	0	0
Arg-DCA	Bifidobacterium adolescentis	12030.502	8879.272667	14607.316	0	7796.86507
Arg-DCA	Bifidobacterium angulatum	6879.648	5234.023667	8822.423	0	4635.714237
Arg-DCA	Bifidobacterium breve	0	4813.198833	19713.156	0	7247.667829
Arg-DCA	Bifidobacterium longum	0	3311.987917	17027.357	0	5523.548482
Arg-DCA	Catabacter hongkongensis	10644.798	8187.091	13916.475	0	7276.490355
Arg-DCA	Cellulosilyticum lentocellum	0	0	0	0	0
Arg-DCA	Clostridiales bacterium oral taxon 876	0	0	0	0	0
Arg-DCA	Clostridium aldenense	0	0	0	0	0
Arg-DCA	Clostridium cadaveris	0	0	0	0	0
Arg-DCA	Clostridium symbiosum	0	0	0	0	0
Arg-DCA	Cutibacterium acnes	0	0	0	0	0
Arg-DCA	Enterococcus faecalis	0	0	0	0	0
Arg-DCA	Enterococcus faecium	0	0	0	0	0
Arg-DCA	Finegoldia magna	0	0	0	0	0
Arg-DCA	Flavonifractor plautii	0	812.3511667	4874.107	0	1989.84585
Arg-DCA	Fusobacterium nucleatum	0	0	0	0	0
Arg-DCA	Fusobacterium periodonticum	0	0	0	0	0
Arg-DCA	Fusobacterium ulcerans	0	0	0	0	0
Arg-DCA	Gardnerella vaginalis	0	0	0	0	0
Arg-DCA	Lachnospiraceae bacterium oral taxon 500	0	0	0	0	0
Arg-DCA	Lactobacillus gasseri	0	0	0	0	0
Arg-DCA	Lactobacillus jensenii	0	0	0	0	0
Arg-DCA	Lactobacillus vaginalis	0	0	0	0	0
Arg-DCA	Mobiluncus mulieris	0	0	0	0	0
Arg-DCA	Olsenella sp. oral taxon 809	0	0	0	0	0
Arg-DCA	Oribacterium sinus	0	0	0	0	0
Arg-DCA	Parabacteroides	0	0	0	0	0
Arg-DCA	Parabacteroides goldsteinii	0	0	0	0	0
Arg-DCA	Parabacteroides johnsonii	0	0	0	0	0
Arg-DCA	Parabacteroides merdae	0	0	0	0	0
Arg-DCA	Parvimonas micra	0	0	0	0	0
Arg-DCA	Parvimonas sp. oral taxon 110	0	0	0	0	0
Arg-DCA	Peptoniphilus lacrimalis	0	0	0	0	0
Arg-DCA	Peptoniphilus sp. oral taxon 386	0	0	0	0	0
Arg-DCA	Peptoniphilus sp. oral taxon 836	0	0	0	0	0
Arg-DCA	Peptostreptococcus anaerobius	0	0	0	0	0
Arg-DCA	Porphyromonas sp. oral taxon 278	0	0	0	0	0
Arg-DCA	Prevotella amnii	0	0	0	0	0
Arg-DCA	Prevotella bivia	0	0	0	0	0
Arg-DCA	Prevotella buccae	0	0	0	0	0
Arg-DCA	Prevotella denticola	0	0	0	0	0
Arg-DCA	Prevotella disiens	0	0	0	0	0
Arg-DCA	Prevotella histicola	0	0	0	0	0
Arg-DCA	Prevotella melaninogenica	0	0	0	0	0
Arg-DCA	Prevotella nigrescens	0	0	0	0	0
Arg-DCA	Prevotella oralis	0	0	0	0	0
Arg-DCA	Prevotella oris	0	0	0	0	0
Arg-DCA	Prevotella sp. oral taxon 317	0	0	0	0	0
Arg-DCA	Prevotella sp. oral taxon 472	0	0	0	0	0
Arg-DCA	Prevotella timonensis	0	0	0	0	0
Arg-DCA	Prevotella veroralis	0	0	0	0	0
Arg-DCA	Propionibacterium acidifaciens	0	0	0	0	0
Arg-DCA	Propionibacterium humerusii	0	0	0	0	0
Arg-DCA	Pseudopropionibacterium propionicum	0	0	0	0	0
Arg-DCA	Selenomonas noxia	0	0	0	0	0
Arg-DCA	Sutterella wadsworthensis	0	0	0	0	0
Arg-DCA	Treponema denticola	0	0	0	0	0
Arg-DCA	unclassified Peptostreptococcaceae (miscellaneous)	0	0	0	0	0
Arg-DCA	Veillonella montpellierensis	0	0	0	0	0
Asn-CA	Actinomyces viscosus	0	0	0	0	0
Asn-CA	Bacteroides caccae	0	0	0	0	0
Asn-CA	Bacteroides cellulosilyticus	0	0	0	0	0
Asn-CA	Bacteroides dorei	0	0	0	0	0
Asn-CA	Bacteroides eggerthii	0	0	0	0	0
Asn-CA	Bacteroides finegoldii	0	0	0	0	0
Asn-CA	Bacteroides fragilis	0	0	0	0	0
Asn-CA	Bacteroides ovatus	0	0	0	0	0
Asn-CA	Bacteroides salyersiae	0	0	0	0	0
Asn-CA	Bacteroides stercoris	0	0	0	0	0
Asn-CA	Bacteroides vulgatus	0	0	0	0	0
Asn-CA	Bifidobacterium adolescentis	0	0	0	0	0
Asn-CA	Bifidobacterium angulatum	0	0	0	0	0
Asn-CA	Bifidobacterium breve	0	363.2811667	4359.374	0	1258.442876
Asn-CA	Bifidobacterium longum	0	365.379	4384.548	0	1265.709984
Asn-CA	Catabacter hongkongensis	0	0	0	0	0
Asn-CA	Cellulosilyticum lentocellum	0	0	0	0	0
Asn-CA	Clostridiales bacterium oral taxon 876	0	0	0	0	0
Asn-CA	Clostridium aldenense	0	0	0	0	0
Asn-CA	Clostridium cadaveris	0	0	0	0	0
Asn-CA	Clostridium symbiosum	0	0	0	0	0
Asn-CA	Cutibacterium acnes	0	0	0	0	0
Asn-CA	Enterococcus faecalis	0	0	0	0	0
Asn-CA	Enterococcus faecium	0	0	0	0	0
Asn-CA	Finegoldia magna	0	0	0	0	0
Asn-CA	Flavonifractor plautii	0	0	0	0	0
Asn-CA	Fusobacterium nucleatum	0	0	0	0	0
Asn-CA	Fusobacterium periodonticum	0	0	0	0	0
Asn-CA	Fusobacterium ulcerans	0	0	0	0	0
Asn-CA	Gardnerella vaginalis	0	0	0	0	0
Asn-CA	Lachnospiraceae bacterium oral taxon 500	0	0	0	0	0
Asn-CA	Lactobacillus gasseri	0	0	0	0	0
Asn-CA	Lactobacillus jensenii	0	0	0	0	0
Asn-CA	Lactobacillus vaginalis	0	0	0	0	0
Asn-CA	Mobiluncus mulieris	0	0	0	0	0
Asn-CA	Olsenella sp. oral taxon 809	0	0	0	0	0
Asn-CA	Oribacterium sinus	0	0	0	0	0
Asn-CA	Parabacteroides	0	0	0	0	0
Asn-CA	Parabacteroides goldsteinii	0	0	0	0	0
Asn-CA	Parabacteroides johnsonii	0	0	0	0	0
Asn-CA	Parabacteroides merdae	0	0	0	0	0
Asn-CA	Parvimonas micra	0	0	0	0	0
Asn-CA	Parvimonas sp. oral taxon 110	0	0	0	0	0
Asn-CA	Peptoniphilus lacrimalis	0	0	0	0	0
Asn-CA	Peptoniphilus sp. oral taxon 386	0	0	0	0	0
Asn-CA	Peptoniphilus sp. oral taxon 836	0	0	0	0	0
Asn-CA	Peptostreptococcus anaerobius	0	0	0	0	0
Asn-CA	Porphyromonas sp. oral taxon 278	0	0	0	0	0
Asn-CA	Prevotella amnii	0	0	0	0	0
Asn-CA	Prevotella bivia	0	0	0	0	0
Asn-CA	Prevotella buccae	0	0	0	0	0
Asn-CA	Prevotella denticola	0	0	0	0	0
Asn-CA	Prevotella disiens	0	0	0	0	0
Asn-CA	Prevotella histicola	0	0	0	0	0
Asn-CA	Prevotella melaninogenica	0	0	0	0	0
Asn-CA	Prevotella nigrescens	0	0	0	0	0
Asn-CA	Prevotella oralis	0	0	0	0	0
Asn-CA	Prevotella oris	0	0	0	0	0
Asn-CA	Prevotella sp. oral taxon 317	0	0	0	0	0
Asn-CA	Prevotella sp. oral taxon 472	0	0	0	0	0
Asn-CA	Prevotella timonensis	0	0	0	0	0
Asn-CA	Prevotella veroralis	0	0	0	0	0
Asn-CA	Propionibacterium acidifaciens	0	0	0	0	0
Asn-CA	Propionibacterium humerusii	0	0	0	0	0
Asn-CA	Pseudopropionibacterium propionicum	0	0	0	0	0
Asn-CA	Selenomonas noxia	0	0	0	0	0
Asn-CA	Sutterella wadsworthensis	0	0	0	0	0
Asn-CA	Treponema denticola	0	0	0	0	0
Asn-CA	unclassified Peptostreptococcaceae (miscellaneous)	0	0	0	0	0
Asn-CA	Veillonella montpellierensis	0	0	0	0	0
Asn-DCA	Actinomyces viscosus	0	0	0	0	0
Asn-DCA	Bacteroides caccae	0	0	0	0	0
Asn-DCA	Bacteroides cellulosilyticus	0	0	0	0	0
Asn-DCA	Bacteroides dorei	0	0	0	0	0
Asn-DCA	Bacteroides eggerthii	0	0	0	0	0
Asn-DCA	Bacteroides finegoldii	0	0	0	0	0
Asn-DCA	Bacteroides fragilis	0	0	0	0	0
Asn-DCA	Bacteroides ovatus	0	0	0	0	0
Asn-DCA	Bacteroides salyersiae	0	0	0	0	0
Asn-DCA	Bacteroides stercoris	0	0	0	0	0
Asn-DCA	Bacteroides vulgatus	0	0	0	0	0
Asn-DCA	Bifidobacterium adolescentis	0	0	0	0	0
Asn-DCA	Bifidobacterium angulatum	0	0	0	0	0
Asn-DCA	Bifidobacterium breve	0	0	0	0	0
Asn-DCA	Bifidobacterium longum	0	0	0	0	0
Asn-DCA	Catabacter hongkongensis	0	0	0	0	0
Asn-DCA	Cellulosilyticum lentocellum	6076.356	4302.093	6829.923	0	3744.725483
Asn-DCA	Clostridiales bacterium oral taxon 876	0	0	0	0	0
Asn-DCA	Clostridium aldenense	0	0	0	0	0
Asn-DCA	Clostridium cadaveris	0	789.9208333	4739.525	0	1934.902979
Asn-DCA	Clostridium symbiosum	0	0	0	0	0
Asn-DCA	Cutibacterium acnes	0	0	0	0	0
Asn-DCA	Enterococcus faecalis	0	0	0	0	0
Asn-DCA	Enterococcus faecium	0	2829.16281	16010.283	0	4964.834942
Asn-DCA	Finegoldia magna	0	0	0	0	0
Asn-DCA	Flavonifractor plautii	0	0	0	0	0
Asn-DCA	Fusobacterium nucleatum	0	471.1278667	7066.918	0	1824.670382
Asn-DCA	Fusobacterium periodonticum	0	0	0	0	0
Asn-DCA	Fusobacterium ulcerans	0	0	0	0	0
Asn-DCA	Gardnerella vaginalis	0	0	0	0	0
Asn-DCA	Lachnospiraceae bacterium oral taxon 500	9146.573	6131.053	9246.586	0	5309.883126
Asn-DCA	Lactobacillus gasseri	0	0	0	0	0
Asn-DCA	Lactobacillus jensenii	0	0	0	0	0
Asn-DCA	Lactobacillus vaginalis	0	0	0	0	0
Asn-DCA	Mobiluncus mulieris	0	0	0	0	0
Asn-DCA	Olsenella sp. oral taxon 809	0	0	0	0	0
Asn-DCA	Oribacterium sinus	0	0	0	0	0
Asn-DCA	Parabacteroides	0	0	0	0	0
Asn-DCA	Parabacteroides goldsteinii	0	0	0	0	0
Asn-DCA	Parabacteroides johnsonii	0	0	0	0	0
Asn-DCA	Parabacteroides merdae	0	0	0	0	0
Asn-DCA	Parvimonas micra	0	0	0	0	0
Asn-DCA	Parvimonas sp. oral taxon 110	0	0	0	0	0
Asn-DCA	Peptoniphilus lacrimalis	0	0	0	0	0
Asn-DCA	Peptoniphilus sp. oral taxon 386	0	0	0	0	0
Asn-DCA	Peptoniphilus sp. oral taxon 836	0	0	0	0	0
Asn-DCA	Peptostreptococcus anaerobius	0	0	0	0	0
Asn-DCA	Porphyromonas sp. oral taxon 278	0	0	0	0	0
Asn-DCA	Prevotella amnii	0	0	0	0	0
Asn-DCA	Prevotella bivia	0	0	0	0	0
Asn-DCA	Prevotella buccae	0	0	0	0	0
Asn-DCA	Prevotella denticola	0	0	0	0	0
Asn-DCA	Prevotella disiens	0	0	0	0	0
Asn-DCA	Prevotella histicola	0	0	0	0	0
Asn-DCA	Prevotella melaninogenica	0	0	0	0	0
Asn-DCA	Prevotella nigrescens	0	0	0	0	0
Asn-DCA	Prevotella oralis	0	0	0	0	0
Asn-DCA	Prevotella oris	0	0	0	0	0
Asn-DCA	Prevotella sp. oral taxon 317	0	0	0	0	0
Asn-DCA	Prevotella sp. oral taxon 472	0	0	0	0	0
Asn-DCA	Prevotella timonensis	0	0	0	0	0
Asn-DCA	Prevotella veroralis	0	0	0	0	0
Asn-DCA	Propionibacterium acidifaciens	0	0	0	0	0
Asn-DCA	Propionibacterium humerusii	0	0	0	0	0
Asn-DCA	Pseudopropionibacterium propionicum	0	0	0	0	0
Asn-DCA	Selenomonas noxia	0	0	0	0	0
Asn-DCA	Sutterella wadsworthensis	0	0	0	0	0
Asn-DCA	Treponema denticola	0	0	0	0	0
Asn-DCA	unclassified Peptostreptococcaceae (miscellaneous)	0	0	0	0	0
Asn-DCA	Veillonella montpellierensis	0	0	0	0	0
Asp-CA	Actinomyces viscosus	0	0	0	0	0
Asp-CA	Bacteroides caccae	0	0	0	0	0
Asp-CA	Bacteroides cellulosilyticus	0	0	0	0	0
Asp-CA	Bacteroides dorei	0	0	0	0	0
Asp-CA	Bacteroides eggerthii	0	0	0	0	0
Asp-CA	Bacteroides finegoldii	0	0	0	0	0
Asp-CA	Bacteroides fragilis	0	0	0	0	0
Asp-CA	Bacteroides ovatus	0	0	0	0	0
Asp-CA	Bacteroides salyersiae	0	0	0	0	0
Asp-CA	Bacteroides stercoris	0	0	0	0	0
Asp-CA	Bacteroides vulgatus	0	0	0	0	0
Asp-CA	Bifidobacterium adolescentis	0	0	0	0	0
Asp-CA	Bifidobacterium angulatum	0	0	0	0	0
Asp-CA	Bifidobacterium breve	0	727.91375	4454.923	0	1700.449067
Asp-CA	Bifidobacterium longum	0	786.1386667	5246.476	0	1849.862052
Asp-CA	Catabacter hongkongensis	0	0	0	0	0
Asp-CA	Cellulosilyticum lentocellum	0	0	0	0	0
Asp-CA	Clostridiales bacterium oral taxon 876	0	0	0	0	0
Asp-CA	Clostridium aldenense	0	0	0	0	0
Asp-CA	Clostridium cadaveris	0	0	0	0	0
Asp-CA	Clostridium symbiosum	0	0	0	0	0
Asp-CA	Cutibacterium acnes	0	0	0	0	0
Asp-CA	Enterococcus faecalis	0	0	0	0	0
Asp-CA	Enterococcus faecium	0	0	0	0	0
Asp-CA	Finegoldia magna	0	0	0	0	0
Asp-CA	Flavonifractor plautii	0	0	0	0	0
Asp-CA	Fusobacterium nucleatum	0	0	0	0	0
Asp-CA	Fusobacterium periodonticum	0	0	0	0	0
Asp-CA	Fusobacterium ulcerans	0	0	0	0	0
Asp-CA	Gardnerella vaginalis	0	0	0	0	0
Asp-CA	Lachnospiraceae bacterium oral taxon 500	0	0	0	0	0
Asp-CA	Lactobacillus gasseri	0	0	0	0	0
Asp-CA	Lactobacillus jensenii	0	0	0	0	0
Asp-CA	Lactobacillus vaginalis	0	0	0	0	0
Asp-CA	Mobiluncus mulieris	0	0	0	0	0
Asp-CA	Olsenella sp. oral taxon 809	0	0	0	0	0
Asp-CA	Oribacterium sinus	0	0	0	0	0
Asp-CA	Parabacteroides	0	0	0	0	0
Asp-CA	Parabacteroides goldsteinii	0	0	0	0	0
Asp-CA	Parabacteroides johnsonii	0	0	0	0	0
Asp-CA	Parabacteroides merdae	0	0	0	0	0
Asp-CA	Parvimonas micra	0	0	0	0	0
Asp-CA	Parvimonas sp. oral taxon 110	0	0	0	0	0
Asp-CA	Peptoniphilus lacrimalis	0	0	0	0	0
Asp-CA	Peptoniphilus sp. oral taxon 386	0	0	0	0	0
Asp-CA	Peptoniphilus sp. oral taxon 836	0	0	0	0	0
Asp-CA	Peptostreptococcus anaerobius	0	0	0	0	0
Asp-CA	Porphyromonas sp. oral taxon 278	0	0	0	0	0
Asp-CA	Prevotella amnii	0	0	0	0	0
Asp-CA	Prevotella bivia	0	0	0	0	0
Asp-CA	Prevotella buccae	0	0	0	0	0
Asp-CA	Prevotella denticola	0	0	0	0	0
Asp-CA	Prevotella disiens	0	0	0	0	0
Asp-CA	Prevotella histicola	0	0	0	0	0
Asp-CA	Prevotella melaninogenica	0	0	0	0	0
Asp-CA	Prevotella nigrescens	0	0	0	0	0
Asp-CA	Prevotella oralis	0	0	0	0	0
Asp-CA	Prevotella oris	0	0	0	0	0
Asp-CA	Prevotella sp. oral taxon 317	0	0	0	0	0
Asp-CA	Prevotella sp. oral taxon 472	0	0	0	0	0
Asp-CA	Prevotella timonensis	0	0	0	0	0
Asp-CA	Prevotella veroralis	0	0	0	0	0
Asp-CA	Propionibacterium acidifaciens	0	0	0	0	0
Asp-CA	Propionibacterium humerusii	0	0	0	0	0
Asp-CA	Pseudopropionibacterium propionicum	0	0	0	0	0
Asp-CA	Selenomonas noxia	0	0	0	0	0
Asp-CA	Sutterella wadsworthensis	0	0	0	0	0
Asp-CA	Treponema denticola	0	0	0	0	0
Asp-CA	unclassified Peptostreptococcaceae (miscellaneous)	0	0	0	0	0
Asp-CA	Veillonella montpellierensis	0	0	0	0	0
Cit-DCA	Actinomyces viscosus	0	0	0	0	0
Cit-DCA	Bacteroides caccae	0	0	0	0	0
Cit-DCA	Bacteroides cellulosilyticus	0	0	0	0	0
Cit-DCA	Bacteroides dorei	0	0	0	0	0
Cit-DCA	Bacteroides eggerthii	0	0	0	0	0
Cit-DCA	Bacteroides finegoldii	0	0	0	0	0
Cit-DCA	Bacteroides fragilis	0	0	0	0	0
Cit-DCA	Bacteroides ovatus	0	0	0	0	0
Cit-DCA	Bacteroides salyersiae	0	0	0	0	0
Cit-DCA	Bacteroides stercoris	0	0	0	0	0
Cit-DCA	Bacteroides vulgatus	0	0	0	0	0
Cit-DCA	Bifidobacterium adolescentis	0	0	0	0	0
Cit-DCA	Bifidobacterium angulatum	0	0	0	0	0
Cit-DCA	Bifidobacterium breve	0	0	0	0	0
Cit-DCA	Bifidobacterium longum	0	0	0	0	0
Cit-DCA	Catabacter hongkongensis	0	0	0	0	0
Cit-DCA	Cellulosilyticum lentocellum	6677.101	5069.644	8531.831	0	4487.31251
Cit-DCA	Clostridiales bacterium oral taxon 876	0	0	0	0	0
Cit-DCA	Clostridium aldenense	0	0	0	0	0
Cit-DCA	Clostridium cadaveris	0	0	0	0	0
Cit-DCA	Clostridium symbiosum	0	0	0	0	0
Cit-DCA	Cutibacterium acnes	0	0	0	0	0
Cit-DCA	Enterococcus faecalis	0	0	0	0	0
Cit-DCA	Enterococcus faecium	4048.984	8132.447476	37420.697	0	11278.98012
Cit-DCA	Finegoldia magna	0	0	0	0	0
Cit-DCA	Flavonifractor plautii	0	0	0	0	0
Cit-DCA	Fusobacterium nucleatum	0	2660.5586	34038.562	0	8811.112601
Cit-DCA	Fusobacterium periodonticum	0	0	0	0	0
Cit-DCA	Fusobacterium ulcerans	0	0	0	0	0
Cit-DCA	Gardnerella vaginalis	0	0	0	0	0
Cit-DCA	Lachnospiraceae bacterium oral taxon 500	7086.316	5197.068667	8504.89	0	4556.33955
Cit-DCA	Lactobacillus gasseri	0	0	0	0	0
Cit-DCA	Lactobacillus jensenii	0	0	0	0	0
Cit-DCA	Lactobacillus vaginalis	0	0	0	0	0
Cit-DCA	Mobiluncus mulieris	0	0	0	0	0
Cit-DCA	Olsenella sp. oral taxon 809	0	0	0	0	0
Cit-DCA	Oribacterium sinus	0	0	0	0	0
Cit-DCA	Parabacteroides	0	0	0	0	0
Cit-DCA	Parabacteroides goldsteinii	0	0	0	0	0
Cit-DCA	Parabacteroides johnsonii	0	0	0	0	0
Cit-DCA	Parabacteroides merdae	0	0	0	0	0
Cit-DCA	Parvimonas micra	0	0	0	0	0
Cit-DCA	Parvimonas sp. oral taxon 110	0	0	0	0	0
Cit-DCA	Peptoniphilus lacrimalis	0	0	0	0	0
Cit-DCA	Peptoniphilus sp. oral taxon 386	0	0	0	0	0
Cit-DCA	Peptoniphilus sp. oral taxon 836	0	0	0	0	0
Cit-DCA	Peptostreptococcus anaerobius	0	0	0	0	0
Cit-DCA	Porphyromonas sp. oral taxon 278	0	0	0	0	0
Cit-DCA	Prevotella amnii	0	0	0	0	0
Cit-DCA	Prevotella bivia	0	0	0	0	0
Cit-DCA	Prevotella buccae	0	0	0	0	0
Cit-DCA	Prevotella denticola	0	0	0	0	0
Cit-DCA	Prevotella disiens	0	0	0	0	0
Cit-DCA	Prevotella histicola	0	0	0	0	0
Cit-DCA	Prevotella melaninogenica	0	0	0	0	0
Cit-DCA	Prevotella nigrescens	0	0	0	0	0
Cit-DCA	Prevotella oralis	0	0	0	0	0
Cit-DCA	Prevotella oris	0	0	0	0	0
Cit-DCA	Prevotella sp. oral taxon 317	0	0	0	0	0
Cit-DCA	Prevotella sp. oral taxon 472	0	0	0	0	0
Cit-DCA	Prevotella timonensis	0	0	0	0	0
Cit-DCA	Prevotella veroralis	0	0	0	0	0
Cit-DCA	Propionibacterium acidifaciens	0	0	0	0	0
Cit-DCA	Propionibacterium humerusii	0	0	0	0	0
Cit-DCA	Pseudopropionibacterium propionicum	0	0	0	0	0
Cit-DCA	Selenomonas noxia	0	0	0	0	0
Cit-DCA	Sutterella wadsworthensis	0	0	0	0	0
Cit-DCA	Treponema denticola	0	0	0	0	0
Cit-DCA	unclassified Peptostreptococcaceae (miscellaneous)	0	0	0	0	0
Cit-DCA	Veillonella montpellierensis	0	0	0	0	0
Cys-CA	Actinomyces viscosus	0	0	0	0	0
Cys-CA	Bacteroides caccae	0	0	0	0	0
Cys-CA	Bacteroides cellulosilyticus	0	0	0	0	0
Cys-CA	Bacteroides dorei	0	0	0	0	0
Cys-CA	Bacteroides eggerthii	0	0	0	0	0
Cys-CA	Bacteroides finegoldii	0	0	0	0	0
Cys-CA	Bacteroides fragilis	0	0	0	0	0
Cys-CA	Bacteroides ovatus	0	0	0	0	0
Cys-CA	Bacteroides salyersiae	0	0	0	0	0
Cys-CA	Bacteroides stercoris	0	0	0	0	0
Cys-CA	Bacteroides vulgatus	0	0	0	0	0
Cys-CA	Bifidobacterium adolescentis	0	923.7283333	2771.185	0	1599.944406
Cys-CA	Bifidobacterium angulatum	0	0	0	0	0
Cys-CA	Bifidobacterium breve	0	1145.719667	6065.531	0	2207.263209
Cys-CA	Bifidobacterium longum	0	0	0	0	0
Cys-CA	Catabacter hongkongensis	0	0	0	0	0
Cys-CA	Cellulosilyticum lentocellum	0	0	0	0	0
Cys-CA	Clostridiales bacterium oral taxon 876	0	0	0	0	0
Cys-CA	Clostridium aldenense	0	0	0	0	0
Cys-CA	Clostridium cadaveris	0	0	0	0	0
Cys-CA	Clostridium symbiosum	0	0	0	0	0
Cys-CA	Cutibacterium acnes	0	0	0	0	0
Cys-CA	Enterococcus faecalis	0	0	0	0	0
Cys-CA	Enterococcus faecium	0	0	0	0	0
Cys-CA	Finegoldia magna	0	0	0	0	0
Cys-CA	Flavonifractor plautii	0	0	0	0	0
Cys-CA	Fusobacterium nucleatum	0	0	0	0	0
Cys-CA	Fusobacterium periodonticum	0	0	0	0	0
Cys-CA	Fusobacterium ulcerans	0	0	0	0	0
Cys-CA	Gardnerella vaginalis	0	0	0	0	0
Cys-CA	Lachnospiraceae bacterium oral taxon 500	0	0	0	0	0
Cys-CA	Lactobacillus gasseri	0	0	0	0	0
Cys-CA	Lactobacillus jensenii	0	0	0	0	0
Cys-CA	Lactobacillus vaginalis	0	0	0	0	0
Cys-CA	Mobiluncus mulieris	0	0	0	0	0
Cys-CA	Olsenella sp. oral taxon 809	0	0	0	0	0
Cys-CA	Oribacterium sinus	0	0	0	0	0
Cys-CA	Parabacteroides	0	0	0	0	0
Cys-CA	Parabacteroides goldsteinii	0	0	0	0	0
Cys-CA	Parabacteroides johnsonii	0	0	0	0	0
Cys-CA	Parabacteroides merdae	0	0	0	0	0
Cys-CA	Parvimonas micra	0	0	0	0	0
Cys-CA	Parvimonas sp. oral taxon 110	0	0	0	0	0
Cys-CA	Peptoniphilus lacrimalis	0	0	0	0	0
Cys-CA	Peptoniphilus sp. oral taxon 386	0	0	0	0	0
Cys-CA	Peptoniphilus sp. oral taxon 836	0	0	0	0	0
Cys-CA	Peptostreptococcus anaerobius	0	0	0	0	0
Cys-CA	Porphyromonas sp. oral taxon 278	0	0	0	0	0
Cys-CA	Prevotella amnii	0	0	0	0	0
Cys-CA	Prevotella bivia	0	0	0	0	0
Cys-CA	Prevotella buccae	0	0	0	0	0
Cys-CA	Prevotella denticola	0	0	0	0	0
Cys-CA	Prevotella disiens	0	0	0	0	0
Cys-CA	Prevotella histicola	0	0	0	0	0
Cys-CA	Prevotella melaninogenica	0	0	0	0	0
Cys-CA	Prevotella nigrescens	0	0	0	0	0
Cys-CA	Prevotella oralis	0	0	0	0	0
Cys-CA	Prevotella oris	0	0	0	0	0
Cys-CA	Prevotella sp. oral taxon 317	0	0	0	0	0
Cys-CA	Prevotella sp. oral taxon 472	0	0	0	0	0
Cys-CA	Prevotella timonensis	0	0	0	0	0
Cys-CA	Prevotella veroralis	0	0	0	0	0
Cys-CA	Propionibacterium acidifaciens	0	0	0	0	0
Cys-CA	Propionibacterium humerusii	0	0	0	0	0
Cys-CA	Pseudopropionibacterium propionicum	0	0	0	0	0
Cys-CA	Selenomonas noxia	0	0	0	0	0
Cys-CA	Sutterella wadsworthensis	0	0	0	0	0
Cys-CA	Treponema denticola	0	0	0	0	0
Cys-CA	unclassified Peptostreptococcaceae (miscellaneous)	0	0	0	0	0
Cys-CA	Veillonella montpellierensis	0	0	0	0	0
Gln-CA	Actinomyces viscosus	0	0	0	0	0
Gln-CA	Bacteroides caccae	0	0	0	0	0
Gln-CA	Bacteroides cellulosilyticus	0	0	0	0	0
Gln-CA	Bacteroides dorei	0	0	0	0	0
Gln-CA	Bacteroides eggerthii	0	0	0	0	0
Gln-CA	Bacteroides finegoldii	0	0	0	0	0
Gln-CA	Bacteroides fragilis	0	0	0	0	0
Gln-CA	Bacteroides ovatus	0	0	0	0	0
Gln-CA	Bacteroides salyersiae	0	0	0	0	0
Gln-CA	Bacteroides stercoris	0	0	0	0	0
Gln-CA	Bacteroides vulgatus	0	0	0	0	0
Gln-CA	Bifidobacterium adolescentis	0	0	0	0	0
Gln-CA	Bifidobacterium angulatum	0	3259.996667	9779.99	0	5646.479859
Gln-CA	Bifidobacterium breve	3695.8775	4966.34	13578.458	0	5448.31879
Gln-CA	Bifidobacterium longum	0	0	0	0	0
Gln-CA	Catabacter hongkongensis	0	0	0	0	0
Gln-CA	Cellulosilyticum lentocellum	0	0	0	0	0
Gln-CA	Clostridiales bacterium oral taxon 876	0	0	0	0	0
Gln-CA	Clostridium aldenense	0	0	0	0	0
Gln-CA	Clostridium cadaveris	0	0	0	0	0
Gln-CA	Clostridium symbiosum	0	0	0	0	0
Gln-CA	Cutibacterium acnes	0	0	0	0	0
Gln-CA	Enterococcus faecalis	0	0	0	0	0
Gln-CA	Enterococcus faecium	0	0	0	0	0
Gln-CA	Finegoldia magna	0	0	0	0	0
Gln-CA	Flavonifractor plautii	0	0	0	0	0
Gln-CA	Fusobacterium nucleatum	0	0	0	0	0
Gln-CA	Fusobacterium periodonticum	0	0	0	0	0
Gln-CA	Fusobacterium ulcerans	0	0	0	0	0
Gln-CA	Gardnerella vaginalis	0	0	0	0	0
Gln-CA	Lachnospiraceae bacterium oral taxon 500	0	0	0	0	0
Gln-CA	Lactobacillus gasseri	0	0	0	0	0
Gln-CA	Lactobacillus jensenii	0	0	0	0	0
Gln-CA	Lactobacillus vaginalis	0	0	0	0	0
Gln-CA	Mobiluncus mulieris	0	0	0	0	0
Gln-CA	Olsenella sp. oral taxon 809	0	0	0	0	0
Gln-CA	Oribacterium sinus	0	0	0	0	0
Gln-CA	Parabacteroides	0	0	0	0	0
Gln-CA	Parabacteroides goldsteinii	0	0	0	0	0
Gln-CA	Parabacteroides johnsonii	0	0	0	0	0
Gln-CA	Parabacteroides merdae	0	0	0	0	0
Gln-CA	Parvimonas micra	0	0	0	0	0
Gln-CA	Parvimonas sp. oral taxon 110	0	0	0	0	0
Gln-CA	Peptoniphilus lacrimalis	0	0	0	0	0
Gln-CA	Peptoniphilus sp. oral taxon 386	0	0	0	0	0
Gln-CA	Peptoniphilus sp. oral taxon 836	0	0	0	0	0
Gln-CA	Peptostreptococcus anaerobius	0	0	0	0	0
Gln-CA	Porphyromonas sp. oral taxon 278	0	0	0	0	0
Gln-CA	Prevotella amnii	0	0	0	0	0
Gln-CA	Prevotella bivia	0	0	0	0	0
Gln-CA	Prevotella buccae	0	0	0	0	0
Gln-CA	Prevotella denticola	0	0	0	0	0
Gln-CA	Prevotella disiens	0	0	0	0	0
Gln-CA	Prevotella histicola	0	0	0	0	0
Gln-CA	Prevotella melaninogenica	0	0	0	0	0
Gln-CA	Prevotella nigrescens	0	0	0	0	0
Gln-CA	Prevotella oralis	0	0	0	0	0
Gln-CA	Prevotella oris	0	0	0	0	0
Gln-CA	Prevotella sp. oral taxon 317	0	0	0	0	0
Gln-CA	Prevotella sp. oral taxon 472	0	0	0	0	0
Gln-CA	Prevotella timonensis	0	0	0	0	0
Gln-CA	Prevotella veroralis	0	0	0	0	0
Gln-CA	Propionibacterium acidifaciens	0	0	0	0	0
Gln-CA	Propionibacterium humerusii	0	0	0	0	0
Gln-CA	Pseudopropionibacterium propionicum	0	0	0	0	0
Gln-CA	Selenomonas noxia	0	0	0	0	0
Gln-CA	Sutterella wadsworthensis	0	0	0	0	0
Gln-CA	Treponema denticola	0	0	0	0	0
Gln-CA	unclassified Peptostreptococcaceae (miscellaneous)	0	0	0	0	0
Gln-CA	Veillonella montpellierensis	0	0	0	0	0
Gln-DCA	Actinomyces viscosus	0	0	0	0	0
Gln-DCA	Bacteroides caccae	0	0	0	0	0
Gln-DCA	Bacteroides cellulosilyticus	0	0	0	0	0
Gln-DCA	Bacteroides dorei	0	0	0	0	0
Gln-DCA	Bacteroides eggerthii	0	0	0	0	0
Gln-DCA	Bacteroides finegoldii	0	0	0	0	0
Gln-DCA	Bacteroides fragilis	0	0	0	0	0
Gln-DCA	Bacteroides ovatus	0	0	0	0	0
Gln-DCA	Bacteroides salyersiae	0	0	0	0	0
Gln-DCA	Bacteroides stercoris	0	0	0	0	0
Gln-DCA	Bacteroides vulgatus	0	0	0	0	0
Gln-DCA	Bifidobacterium adolescentis	0	0	0	0	0
Gln-DCA	Bifidobacterium angulatum	0	0	0	0	0
Gln-DCA	Bifidobacterium breve	4465.2825	8648.6045	24163.511	0	9850.747268
Gln-DCA	Bifidobacterium longum	0	0	0	0	0
Gln-DCA	Catabacter hongkongensis	38988.534	26278.253	39846.225	0	22761.67489
Gln-DCA	Cellulosilyticum lentocellum	0	1771.116	5313.348	0	3067.662898
Gln-DCA	Clostridiales bacterium oral taxon 876	0	0	0	0	0
Gln-DCA	Clostridium aldenense	0	0	0	0	0
Gln-DCA	Clostridium cadaveris	0	0	0	0	0
Gln-DCA	Clostridium symbiosum	0	0	0	0	0
Gln-DCA	Cutibacterium acnes	0	0	0	0	0
Gln-DCA	Enterococcus faecalis	0	0	0	0	0
Gln-DCA	Enterococcus faecium	0	2034.895048	12685.088	0	4056.596656
Gln-DCA	Finegoldia magna	0	0	0	0	0
Gln-DCA	Flavonifractor plautii	0	0	0	0	0
Gln-DCA	Fusobacterium nucleatum	0	945.0967333	8146.61	0	2525.98099
Gln-DCA	Fusobacterium periodonticum	0	0	0	0	0
Gln-DCA	Fusobacterium ulcerans	0	0	0	0	0
Gln-DCA	Gardnerella vaginalis	0	0	0	0	0
Gln-DCA	Lachnospiraceae bacterium oral taxon 500	0	7342.145	22026.435	0	12716.96818
Gln-DCA	Lactobacillus gasseri	0	0	0	0	0
Gln-DCA	Lactobacillus jensenii	0	0	0	0	0
Gln-DCA	Lactobacillus vaginalis	0	0	0	0	0
Gln-DCA	Mobiluncus mulieris	0	0	0	0	0
Gln-DCA	Olsenella sp. oral taxon 809	0	0	0	0	0
Gln-DCA	Oribacterium sinus	0	0	0	0	0
Gln-DCA	Parabacteroides	0	0	0	0	0
Gln-DCA	Parabacteroides goldsteinii	0	0	0	0	0
Gln-DCA	Parabacteroides johnsonii	0	0	0	0	0
Gln-DCA	Parabacteroides merdae	0	0	0	0	0
Gln-DCA	Parvimonas micra	0	0	0	0	0
Gln-DCA	Parvimonas sp. oral taxon 110	0	0	0	0	0
Gln-DCA	Peptoniphilus lacrimalis	0	0	0	0	0
Gln-DCA	Peptoniphilus sp. oral taxon 386	0	0	0	0	0
Gln-DCA	Peptoniphilus sp. oral taxon 836	0	0	0	0	0
Gln-DCA	Peptostreptococcus anaerobius	0	0	0	0	0
Gln-DCA	Porphyromonas sp. oral taxon 278	0	0	0	0	0
Gln-DCA	Prevotella amnii	0	0	0	0	0
Gln-DCA	Prevotella bivia	0	0	0	0	0
Gln-DCA	Prevotella buccae	0	0	0	0	0
Gln-DCA	Prevotella denticola	0	0	0	0	0
Gln-DCA	Prevotella disiens	0	0	0	0	0
Gln-DCA	Prevotella histicola	0	0	0	0	0
Gln-DCA	Prevotella melaninogenica	0	0	0	0	0
Gln-DCA	Prevotella nigrescens	0	0	0	0	0
Gln-DCA	Prevotella oralis	0	0	0	0	0
Gln-DCA	Prevotella oris	0	0	0	0	0
Gln-DCA	Prevotella sp. oral taxon 317	0	0	0	0	0
Gln-DCA	Prevotella sp. oral taxon 472	0	0	0	0	0
Gln-DCA	Prevotella timonensis	0	0	0	0	0
Gln-DCA	Prevotella veroralis	0	0	0	0	0
Gln-DCA	Propionibacterium acidifaciens	0	0	0	0	0
Gln-DCA	Propionibacterium humerusii	0	0	0	0	0
Gln-DCA	Pseudopropionibacterium propionicum	0	0	0	0	0
Gln-DCA	Selenomonas noxia	0	0	0	0	0
Gln-DCA	Sutterella wadsworthensis	0	0	0	0	0
Gln-DCA	Treponema denticola	0	0	0	0	0
Gln-DCA	unclassified Peptostreptococcaceae (miscellaneous)	0	0	0	0	0
Gln-DCA	Veillonella montpellierensis	0	0	0	0	0
Glu-CA	Actinomyces viscosus	0	0	0	0	0
Glu-CA	Bacteroides caccae	0	0	0	0	0
Glu-CA	Bacteroides cellulosilyticus	0	0	0	0	0
Glu-CA	Bacteroides dorei	0	0	0	0	0
Glu-CA	Bacteroides eggerthii	0	0	0	0	0
Glu-CA	Bacteroides finegoldii	0	0	0	0	0
Glu-CA	Bacteroides fragilis	0	0	0	0	0
Glu-CA	Bacteroides ovatus	0	0	0	0	0
Glu-CA	Bacteroides salyersiae	0	0	0	0	0
Glu-CA	Bacteroides stercoris	0	0	0	0	0
Glu-CA	Bacteroides vulgatus	0	0	0	0	0
Glu-CA	Bifidobacterium adolescentis	0	3000.275667	9000.827	0	5196.629891
Glu-CA	Bifidobacterium angulatum	0	1639.358667	4918.076	0	2839.452502
Glu-CA	Bifidobacterium breve	6556.527	10327.491	29493.904	0	10963.61897
Glu-CA	Bifidobacterium longum	10052.941	7880.815417	19219.855	0	7558.283594
Glu-CA	Catabacter hongkongensis	0	0	0	0	0
Glu-CA	Cellulosilyticum lentocellum	0	0	0	0	0
Glu-CA	Clostridiales bacterium oral taxon 876	0	0	0	0	0
Glu-CA	Clostridium aldenense	0	0	0	0	0
Glu-CA	Clostridium cadaveris	0	0	0	0	0
Glu-CA	Clostridium symbiosum	0	0	0	0	0
Glu-CA	Cutibacterium acnes	0	0	0	0	0
Glu-CA	Enterococcus faecalis	0	0	0	0	0
Glu-CA	Enterococcus faecium	0	221.696619	4655.629	0	1015.941538
Glu-CA	Finegoldia magna	0	0	0	0	0
Glu-CA	Flavonifractor plautii	0	0	0	0	0
Glu-CA	Fusobacterium nucleatum	0	0	0	0	0
Glu-CA	Fusobacterium periodonticum	0	0	0	0	0
Glu-CA	Fusobacterium ulcerans	0	0	0	0	0
Glu-CA	Gardnerella vaginalis	0	0	0	0	0
Glu-CA	Lachnospiraceae bacterium oral taxon 500	0	0	0	0	0
Glu-CA	Lactobacillus gasseri	0	0	0	0	0
Glu-CA	Lactobacillus jensenii	0	0	0	0	0
Glu-CA	Lactobacillus vaginalis	0	0	0	0	0
Glu-CA	Mobiluncus mulieris	0	0	0	0	0
Glu-CA	Olsenella sp. oral taxon 809	0	0	0	0	0
Glu-CA	Oribacterium sinus	0	0	0	0	0
Glu-CA	Parabacteroides	0	0	0	0	0
Glu-CA	Parabacteroides goldsteinii	0	0	0	0	0
Glu-CA	Parabacteroides johnsonii	0	0	0	0	0
Glu-CA	Parabacteroides merdae	0	0	0	0	0
Glu-CA	Parvimonas micra	0	0	0	0	0
Glu-CA	Parvimonas sp. oral taxon 110	0	0	0	0	0
Glu-CA	Peptoniphilus lacrimalis	0	0	0	0	0
Glu-CA	Peptoniphilus sp. oral taxon 386	0	0	0	0	0
Glu-CA	Peptoniphilus sp. oral taxon 836	0	0	0	0	0
Glu-CA	Peptostreptococcus anaerobius	0	0	0	0	0
Glu-CA	Porphyromonas sp. oral taxon 278	0	0	0	0	0
Glu-CA	Prevotella amnii	0	0	0	0	0
Glu-CA	Prevotella bivia	0	0	0	0	0
Glu-CA	Prevotella buccae	0	0	0	0	0
Glu-CA	Prevotella denticola	0	0	0	0	0
Glu-CA	Prevotella disiens	0	0	0	0	0
Glu-CA	Prevotella histicola	0	0	0	0	0
Glu-CA	Prevotella melaninogenica	0	0	0	0	0
Glu-CA	Prevotella nigrescens	0	0	0	0	0
Glu-CA	Prevotella oralis	0	0	0	0	0
Glu-CA	Prevotella oris	0	0	0	0	0
Glu-CA	Prevotella sp. oral taxon 317	0	0	0	0	0
Glu-CA	Prevotella sp. oral taxon 472	0	0	0	0	0
Glu-CA	Prevotella timonensis	0	0	0	0	0
Glu-CA	Prevotella veroralis	0	0	0	0	0
Glu-CA	Propionibacterium acidifaciens	0	0	0	0	0
Glu-CA	Propionibacterium humerusii	0	0	0	0	0
Glu-CA	Pseudopropionibacterium propionicum	0	0	0	0	0
Glu-CA	Selenomonas noxia	0	0	0	0	0
Glu-CA	Sutterella wadsworthensis	0	0	0	0	0
Glu-CA	Treponema denticola	0	0	0	0	0
Glu-CA	unclassified Peptostreptococcaceae (miscellaneous)	0	0	0	0	0
Glu-CA	Veillonella montpellierensis	0	0	0	0	0
Glu-DCA	Actinomyces viscosus	0	0	0	0	0
Glu-DCA	Bacteroides caccae	0	0	0	0	0
Glu-DCA	Bacteroides cellulosilyticus	0	0	0	0	0
Glu-DCA	Bacteroides dorei	0	0	0	0	0
Glu-DCA	Bacteroides eggerthii	0	0	0	0	0
Glu-DCA	Bacteroides finegoldii	0	0	0	0	0
Glu-DCA	Bacteroides fragilis	0	0	0	0	0
Glu-DCA	Bacteroides ovatus	0	0	0	0	0
Glu-DCA	Bacteroides salyersiae	0	0	0	0	0
Glu-DCA	Bacteroides stercoris	0	0	0	0	0
Glu-DCA	Bacteroides vulgatus	0	0	0	0	0
Glu-DCA	Bifidobacterium adolescentis	0	0	0	0	0
Glu-DCA	Bifidobacterium angulatum	0	0	0	0	0
Glu-DCA	Bifidobacterium breve	0	3223.224167	16041.252	0	5341.077966
Glu-DCA	Bifidobacterium longum	6610.0405	6938.309167	15076.957	0	6010.0172
Glu-DCA	Catabacter hongkongensis	4504.362	3243.194667	5225.222	0	2831.720947
Glu-DCA	Cellulosilyticum lentocellum	11191.206	7523.891333	11380.468	0	6516.568163
Glu-DCA	Clostridiales bacterium oral taxon 876	0	0	0	0	0
Glu-DCA	Clostridium aldenense	0	0	0	0	0
Glu-DCA	Clostridium cadaveris	0	0	0	0	0
Glu-DCA	Clostridium symbiosum	0	0	0	0	0
Glu-DCA	Cutibacterium acnes	0	0	0	0	0
Glu-DCA	Enterococcus faecalis	0	0	0	0	0
Glu-DCA	Enterococcus faecium	0	7134.124952	45352.774	0	11634.61283
Glu-DCA	Finegoldia magna	0	0	0	0	0
Glu-DCA	Flavonifractor plautii	0	0	0	0	0
Glu-DCA	Fusobacterium nucleatum	0	1585.964867	12818.498	0	4199.888732
Glu-DCA	Fusobacterium periodonticum	0	0	0	0	0
Glu-DCA	Fusobacterium ulcerans	0	0	0	0	0
Glu-DCA	Gardnerella vaginalis	0	0	0	0	0
Glu-DCA	Lachnospiraceae bacterium oral taxon 500	7760.94	8561.874333	17924.683	0	8989.14273
Glu-DCA	Lactobacillus gasseri	0	0	0	0	0
Glu-DCA	Lactobacillus jensenii	0	0	0	0	0
Glu-DCA	Lactobacillus vaginalis	0	0	0	0	0
Glu-DCA	Mobiluncus mulieris	0	0	0	0	0
Glu-DCA	Olsenella sp. oral taxon 809	0	0	0	0	0
Glu-DCA	Oribacterium sinus	0	0	0	0	0
Glu-DCA	Parabacteroides	0	0	0	0	0
Glu-DCA	Parabacteroides goldsteinii	0	0	0	0	0
Glu-DCA	Parabacteroides johnsonii	0	0	0	0	0
Glu-DCA	Parabacteroides merdae	0	0	0	0	0
Glu-DCA	Parvimonas micra	0	0	0	0	0
Glu-DCA	Parvimonas sp. oral taxon 110	0	0	0	0	0
Glu-DCA	Peptoniphilus lacrimalis	0	0	0	0	0
Glu-DCA	Peptoniphilus sp. oral taxon 386	0	0	0	0	0
Glu-DCA	Peptoniphilus sp. oral taxon 836	0	0	0	0	0
Glu-DCA	Peptostreptococcus anaerobius	0	0	0	0	0
Glu-DCA	Porphyromonas sp. oral taxon 278	0	0	0	0	0
Glu-DCA	Prevotella amnii	0	0	0	0	0
Glu-DCA	Prevotella bivia	0	0	0	0	0
Glu-DCA	Prevotella buccae	0	0	0	0	0
Glu-DCA	Prevotella denticola	0	0	0	0	0
Glu-DCA	Prevotella disiens	0	0	0	0	0
Glu-DCA	Prevotella histicola	0	0	0	0	0
Glu-DCA	Prevotella melaninogenica	0	0	0	0	0
Glu-DCA	Prevotella nigrescens	0	0	0	0	0
Glu-DCA	Prevotella oralis	0	0	0	0	0
Glu-DCA	Prevotella oris	0	0	0	0	0
Glu-DCA	Prevotella sp. oral taxon 317	0	0	0	0	0
Glu-DCA	Prevotella sp. oral taxon 472	0	0	0	0	0
Glu-DCA	Prevotella timonensis	0	0	0	0	0
Glu-DCA	Prevotella veroralis	0	0	0	0	0
Glu-DCA	Propionibacterium acidifaciens	0	0	0	0	0
Glu-DCA	Propionibacterium humerusii	0	0	0	0	0
Glu-DCA	Pseudopropionibacterium propionicum	0	0	0	0	0
Glu-DCA	Selenomonas noxia	0	0	0	0	0
Glu-DCA	Sutterella wadsworthensis	0	0	0	0	0
Glu-DCA	Treponema denticola	0	0	0	0	0
Glu-DCA	unclassified Peptostreptococcaceae (miscellaneous)	0	0	0	0	0
Glu-DCA	Veillonella montpellierensis	0	0	0	0	0
His-CA	Actinomyces viscosus	0	0	0	0	0
His-CA	Bacteroides caccae	0	0	0	0	0
His-CA	Bacteroides cellulosilyticus	0	0	0	0	0
His-CA	Bacteroides dorei	0	0	0	0	0
His-CA	Bacteroides eggerthii	0	0	0	0	0
His-CA	Bacteroides finegoldii	0	0	0	0	0
His-CA	Bacteroides fragilis	0	0	0	0	0
His-CA	Bacteroides ovatus	0	0	0	0	0
His-CA	Bacteroides salyersiae	0	0	0	0	0
His-CA	Bacteroides stercoris	0	0	0	0	0
His-CA	Bacteroides vulgatus	0	0	0	0	0
His-CA	Bifidobacterium adolescentis	24136.106	17516.734	28414.096	0	15319.99599
His-CA	Bifidobacterium angulatum	4596.672	6683.444	15453.66	0	7935.355372
His-CA	Bifidobacterium breve	6740.252	16780.84692	67102.457	0	24129.71727
His-CA	Bifidobacterium longum	0	982.0535833	4789.832	0	1872.434984
His-CA	Catabacter hongkongensis	0	0	0	0	0
His-CA	Cellulosilyticum lentocellum	0	0	0	0	0
His-CA	Clostridiales bacterium oral taxon 876	0	0	0	0	0
His-CA	Clostridium aldenense	0	0	0	0	0
His-CA	Clostridium cadaveris	0	0	0	0	0
His-CA	Clostridium symbiosum	0	0	0	0	0
His-CA	Cutibacterium acnes	0	0	0	0	0
His-CA	Enterococcus faecalis	0	0	0	0	0
His-CA	Enterococcus faecium	0	0	0	0	0
His-CA	Finegoldia magna	0	0	0	0	0
His-CA	Flavonifractor plautii	0	0	0	0	0
His-CA	Fusobacterium nucleatum	0	0	0	0	0
His-CA	Fusobacterium periodonticum	0	0	0	0	0
His-CA	Fusobacterium ulcerans	0	0	0	0	0
His-CA	Gardnerella vaginalis	0	0	0	0	0
His-CA	Lachnospiraceae bacterium oral taxon 500	0	710.6713333	2132.014	0	1230.918857
His-CA	Lactobacillus gasseri	0	0	0	0	0
His-CA	Lactobacillus jensenii	0	0	0	0	0
His-CA	Lactobacillus vaginalis	0	0	0	0	0
His-CA	Mobiluncus mulieris	0	0	0	0	0
His-CA	Olsenella sp. oral taxon 809	0	0	0	0	0
His-CA	Oribacterium sinus	0	0	0	0	0
His-CA	Parabacteroides	0	0	0	0	0
His-CA	Parabacteroides goldsteinii	0	0	0	0	0
His-CA	Parabacteroides johnsonii	0	0	0	0	0
His-CA	Parabacteroides merdae	0	0	0	0	0
His-CA	Parvimonas micra	0	0	0	0	0
His-CA	Parvimonas sp. oral taxon 110	0	0	0	0	0
His-CA	Peptoniphilus lacrimalis	0	0	0	0	0
His-CA	Peptoniphilus sp. oral taxon 386	0	0	0	0	0
His-CA	Peptoniphilus sp. oral taxon 836	0	0	0	0	0
His-CA	Peptostreptococcus anaerobius	0	0	0	0	0
His-CA	Porphyromonas sp. oral taxon 278	0	0	0	0	0
His-CA	Prevotella amnii	0	0	0	0	0
His-CA	Prevotella bivia	0	0	0	0	0
His-CA	Prevotella buccae	0	0	0	0	0
His-CA	Prevotella denticola	0	0	0	0	0
His-CA	Prevotella disiens	0	0	0	0	0
His-CA	Prevotella histicola	0	0	0	0	0
His-CA	Prevotella melaninogenica	0	0	0	0	0
His-CA	Prevotella nigrescens	0	0	0	0	0
His-CA	Prevotella oralis	0	0	0	0	0
His-CA	Prevotella oris	0	0	0	0	0
His-CA	Prevotella sp. oral taxon 317	0	0	0	0	0
His-CA	Prevotella sp. oral taxon 472	0	0	0	0	0
His-CA	Prevotella timonensis	0	0	0	0	0
His-CA	Prevotella veroralis	0	0	0	0	0
His-CA	Propionibacterium acidifaciens	0	0	0	0	0
His-CA	Propionibacterium humerusii	0	0	0	0	0
His-CA	Pseudopropionibacterium propionicum	0	0	0	0	0
His-CA	Selenomonas noxia	0	0	0	0	0
His-CA	Sutterella wadsworthensis	0	0	0	0	0
His-CA	Treponema denticola	0	0	0	0	0
His-CA	unclassified Peptostreptococcaceae (miscellaneous)	0	0	0	0	0
His-CA	Veillonella montpellierensis	0	0	0	0	0
His-DCA	Actinomyces viscosus	0	0	0	0	0
His-DCA	Bacteroides caccae	0	0	0	0	0
His-DCA	Bacteroides cellulosilyticus	0	0	0	0	0
His-DCA	Bacteroides dorei	0	0	0	0	0
His-DCA	Bacteroides eggerthii	0	0	0	0	0
His-DCA	Bacteroides finegoldii	0	0	0	0	0
His-DCA	Bacteroides fragilis	0	0	0	0	0
His-DCA	Bacteroides ovatus	0	0	0	0	0
His-DCA	Bacteroides salyersiae	0	0	0	0	0
His-DCA	Bacteroides stercoris	0	0	0	0	0
His-DCA	Bacteroides vulgatus	0	0	0	0	0
His-DCA	Bifidobacterium adolescentis	35511.199	31541.96	59114.681	0	29756.55425
His-DCA	Bifidobacterium angulatum	18033.551	13245.276	21702.277	0	11616.49215
His-DCA	Bifidobacterium breve	24876.3645	34743.20067	94185.013	0	35512.15587
His-DCA	Bifidobacterium longum	2339.72	3913.036083	11466.829	0	4536.116711
His-DCA	Catabacter hongkongensis	0	0	0	0	0
His-DCA	Cellulosilyticum lentocellum	21361.355	15172.191	24155.218	0	13213.55185
His-DCA	Clostridiales bacterium oral taxon 876	0	0	0	0	0
His-DCA	Clostridium aldenense	0	0	0	0	0
His-DCA	Clostridium cadaveris	0	0	0	0	0
His-DCA	Clostridium symbiosum	0	0	0	0	0
His-DCA	Cutibacterium acnes	0	0	0	0	0
His-DCA	Enterococcus faecalis	0	0	0	0	0
His-DCA	Enterococcus faecium	4033.393	11455.47595	51240.284	0	16289.55024
His-DCA	Finegoldia magna	0	0	0	0	0
His-DCA	Flavonifractor plautii	0	0	0	0	0
His-DCA	Fusobacterium nucleatum	0	2819.5002	22135.442	0	7450.029626
His-DCA	Fusobacterium periodonticum	0	0	0	0	0
His-DCA	Fusobacterium ulcerans	0	0	0	0	0
His-DCA	Gardnerella vaginalis	0	0	0	0	0
His-DCA	Lachnospiraceae bacterium oral taxon 500	24247.706	17784.001	29104.297	0	15591.65282
His-DCA	Lactobacillus gasseri	0	0	0	0	0
His-DCA	Lactobacillus jensenii	0	0	0	0	0
His-DCA	Lactobacillus vaginalis	0	0	0	0	0
His-DCA	Mobiluncus mulieris	0	0	0	0	0
His-DCA	Olsenella sp. oral taxon 809	0	0	0	0	0
His-DCA	Oribacterium sinus	0	0	0	0	0
His-DCA	Parabacteroides	0	0	0	0	0
His-DCA	Parabacteroides goldsteinii	0	0	0	0	0
His-DCA	Parabacteroides johnsonii	0	0	0	0	0
His-DCA	Parabacteroides merdae	0	0	0	0	0
His-DCA	Parvimonas micra	0	0	0	0	0
His-DCA	Parvimonas sp. oral taxon 110	0	0	0	0	0
His-DCA	Peptoniphilus lacrimalis	0	0	0	0	0
His-DCA	Peptoniphilus sp. oral taxon 386	0	0	0	0	0
His-DCA	Peptoniphilus sp. oral taxon 836	0	0	0	0	0
His-DCA	Peptostreptococcus anaerobius	0	0	0	0	0
His-DCA	Porphyromonas sp. oral taxon 278	0	0	0	0	0
His-DCA	Prevotella amnii	0	0	0	0	0
His-DCA	Prevotella bivia	0	0	0	0	0
His-DCA	Prevotella buccae	0	0	0	0	0
His-DCA	Prevotella denticola	0	0	0	0	0
His-DCA	Prevotella disiens	0	0	0	0	0
His-DCA	Prevotella histicola	0	0	0	0	0
His-DCA	Prevotella melaninogenica	0	0	0	0	0
His-DCA	Prevotella nigrescens	0	0	0	0	0
His-DCA	Prevotella oralis	0	0	0	0	0
His-DCA	Prevotella oris	0	0	0	0	0
His-DCA	Prevotella sp. oral taxon 317	0	0	0	0	0
His-DCA	Prevotella sp. oral taxon 472	0	0	0	0	0
His-DCA	Prevotella timonensis	0	0	0	0	0
His-DCA	Prevotella veroralis	0	0	0	0	0
His-DCA	Propionibacterium acidifaciens	0	0	0	0	0
His-DCA	Propionibacterium humerusii	0	0	0	0	0
His-DCA	Pseudopropionibacterium propionicum	0	0	0	0	0
His-DCA	Selenomonas noxia	0	0	0	0	0
His-DCA	Sutterella wadsworthensis	0	0	0	0	0
His-DCA	Treponema denticola	0	0	0	0	0
His-DCA	unclassified Peptostreptococcaceae (miscellaneous)	0	0	0	0	0
His-DCA	Veillonella montpellierensis	0	0	0	0	0
Ile/Leu-CA	Actinomyces viscosus	0	0	0	0	0
Ile/Leu-CA	Bacteroides caccae	0	0	0	0	0
Ile/Leu-CA	Bacteroides cellulosilyticus	0	0	0	0	0
Ile/Leu-CA	Bacteroides dorei	0	0	0	0	0
Ile/Leu-CA	Bacteroides eggerthii	0	0	0	0	0
Ile/Leu-CA	Bacteroides finegoldii	0	0	0	0	0
Ile/Leu-CA	Bacteroides fragilis	0	0	0	0	0
Ile/Leu-CA	Bacteroides ovatus	0	0	0	0	0
Ile/Leu-CA	Bacteroides salyersiae	0	0	0	0	0
Ile/Leu-CA	Bacteroides stercoris	0	0	0	0	0
Ile/Leu-CA	Bacteroides vulgatus	0	0	0	0	0
Ile/Leu-CA	Bifidobacterium adolescentis	0	0	0	0	0
Ile/Leu-CA	Bifidobacterium angulatum	0	0	0	0	0
Ile/Leu-CA	Bifidobacterium breve	0	0	0	0	0
Ile/Leu-CA	Bifidobacterium longum	0	0	0	0	0
Ile/Leu-CA	Catabacter hongkongensis	0	0	0	0	0
Ile/Leu-CA	Cellulosilyticum lentocellum	0	0	0	0	0
Ile/Leu-CA	Clostridiales bacterium oral taxon 876	0	0	0	0	0
Ile/Leu-CA	Clostridium aldenense	0	0	0	0	0
Ile/Leu-CA	Clostridium cadaveris	0	10986.22233	36413.299	0	17159.45185
Ile/Leu-CA	Clostridium symbiosum	0	0	0	0	0
Ile/Leu-CA	Cutibacterium acnes	0	0	0	0	0
Ile/Leu-CA	Enterococcus faecalis	0	0	0	0	0
Ile/Leu-CA	Enterococcus faecium	0	0	0	0	0
Ile/Leu-CA	Finegoldia magna	0	0	0	0	0
Ile/Leu-CA	Flavonifractor plautii	0	0	0	0	0
Ile/Leu-CA	Fusobacterium nucleatum	0	0	0	0	0
Ile/Leu-CA	Fusobacterium periodonticum	0	0	0	0	0
Ile/Leu-CA	Fusobacterium ulcerans	0	0	0	0	0
Ile/Leu-CA	Gardnerella vaginalis	0	0	0	0	0
Ile/Leu-CA	Lachnospiraceae bacterium oral taxon 500	0	0	0	0	0
Ile/Leu-CA	Lactobacillus gasseri	0	0	0	0	0
Ile/Leu-CA	Lactobacillus jensenii	0	0	0	0	0
Ile/Leu-CA	Lactobacillus vaginalis	0	0	0	0	0
Ile/Leu-CA	Mobiluncus mulieris	0	0	0	0	0
Ile/Leu-CA	Olsenella sp. oral taxon 809	0	0	0	0	0
Ile/Leu-CA	Oribacterium sinus	0	0	0	0	0
Ile/Leu-CA	Parabacteroides	0	0	0	0	0
Ile/Leu-CA	Parabacteroides goldsteinii	0	0	0	0	0
Ile/Leu-CA	Parabacteroides johnsonii	0	0	0	0	0
Ile/Leu-CA	Parabacteroides merdae	0	0	0	0	0
Ile/Leu-CA	Parvimonas micra	0	0	0	0	0
Ile/Leu-CA	Parvimonas sp. oral taxon 110	0	0	0	0	0
Ile/Leu-CA	Peptoniphilus lacrimalis	0	0	0	0	0
Ile/Leu-CA	Peptoniphilus sp. oral taxon 386	0	0	0	0	0
Ile/Leu-CA	Peptoniphilus sp. oral taxon 836	0	0	0	0	0
Ile/Leu-CA	Peptostreptococcus anaerobius	0	0	0	0	0
Ile/Leu-CA	Porphyromonas sp. oral taxon 278	0	0	0	0	0
Ile/Leu-CA	Prevotella amnii	0	0	0	0	0
Ile/Leu-CA	Prevotella bivia	0	0	0	0	0
Ile/Leu-CA	Prevotella buccae	0	0	0	0	0
Ile/Leu-CA	Prevotella denticola	0	0	0	0	0
Ile/Leu-CA	Prevotella disiens	0	0	0	0	0
Ile/Leu-CA	Prevotella histicola	0	0	0	0	0
Ile/Leu-CA	Prevotella melaninogenica	0	0	0	0	0
Ile/Leu-CA	Prevotella nigrescens	0	0	0	0	0
Ile/Leu-CA	Prevotella oralis	0	0	0	0	0
Ile/Leu-CA	Prevotella oris	0	0	0	0	0
Ile/Leu-CA	Prevotella sp. oral taxon 317	0	0	0	0	0
Ile/Leu-CA	Prevotella sp. oral taxon 472	0	0	0	0	0
Ile/Leu-CA	Prevotella timonensis	0	0	0	0	0
Ile/Leu-CA	Prevotella veroralis	0	0	0	0	0
Ile/Leu-CA	Propionibacterium acidifaciens	0	0	0	0	0
Ile/Leu-CA	Propionibacterium humerusii	0	0	0	0	0
Ile/Leu-CA	Pseudopropionibacterium propionicum	0	0	0	0	0
Ile/Leu-CA	Selenomonas noxia	0	0	0	0	0
Ile/Leu-CA	Sutterella wadsworthensis	0	0	0	0	0
Ile/Leu-CA	Treponema denticola	0	0	0	0	0
Ile/Leu-CA	unclassified Peptostreptococcaceae (miscellaneous)	0	0	0	0	0
Ile/Leu-CA	Veillonella montpellierensis	0	0	0	0	0
Ile/Leu-DCA	Actinomyces viscosus	0	0	0	0	0
Ile/Leu-DCA	Bacteroides caccae	0	0	0	0	0
Ile/Leu-DCA	Bacteroides cellulosilyticus	0	0	0	0	0
Ile/Leu-DCA	Bacteroides dorei	0	0	0	0	0
Ile/Leu-DCA	Bacteroides eggerthii	0	0	0	0	0
Ile/Leu-DCA	Bacteroides finegoldii	0	0	0	0	0
Ile/Leu-DCA	Bacteroides fragilis	0	0	0	0	0
Ile/Leu-DCA	Bacteroides ovatus	0	0	0	0	0
Ile/Leu-DCA	Bacteroides salyersiae	0	0	0	0	0
Ile/Leu-DCA	Bacteroides stercoris	0	0	0	0	0
Ile/Leu-DCA	Bacteroides vulgatus	0	0	0	0	0
Ile/Leu-DCA	Bifidobacterium adolescentis	0	0	0	0	0
Ile/Leu-DCA	Bifidobacterium angulatum	0	1921.78	5765.34	0	3328.620601
Ile/Leu-DCA	Bifidobacterium breve	0	0	0	0	0
Ile/Leu-DCA	Bifidobacterium longum	0	0	0	0	0
Ile/Leu-DCA	Catabacter hongkongensis	8279.612	5981.661333	9665.372	0	5226.402867
Ile/Leu-DCA	Cellulosilyticum lentocellum	0	0	0	0	0
Ile/Leu-DCA	Clostridiales bacterium oral taxon 876	0	0	0	0	0
Ile/Leu-DCA	Clostridium aldenense	0	0	0	0	0
Ile/Leu-DCA	Clostridium cadaveris	0	46479.1585	156464.723	0	72806.04427
Ile/Leu-DCA	Clostridium symbiosum	0	0	0	0	0
Ile/Leu-DCA	Cutibacterium acnes	0	0	0	0	0
Ile/Leu-DCA	Enterococcus faecalis	0	0	0	0	0
Ile/Leu-DCA	Enterococcus faecium	0	573.6660476	6177.131	0	1812.473578
Ile/Leu-DCA	Finegoldia magna	0	0	0	0	0
Ile/Leu-DCA	Flavonifractor plautii	0	0	0	0	0
Ile/Leu-DCA	Fusobacterium nucleatum	0	0	0	0	0
Ile/Leu-DCA	Fusobacterium periodonticum	0	0	0	0	0
Ile/Leu-DCA	Fusobacterium ulcerans	18787.593	13719.46533	22370.803	0	12015.72492
Ile/Leu-DCA	Gardnerella vaginalis	0	0	0	0	0
Ile/Leu-DCA	Lachnospiraceae bacterium oral taxon 500	0	1804.288667	5412.866	0	3125.119642
Ile/Leu-DCA	Lactobacillus gasseri	0	0	0	0	0
Ile/Leu-DCA	Lactobacillus jensenii	0	0	0	0	0
Ile/Leu-DCA	Lactobacillus vaginalis	0	0	0	0	0
Ile/Leu-DCA	Mobiluncus mulieris	0	0	0	0	0
Ile/Leu-DCA	Olsenella sp. oral taxon 809	0	0	0	0	0
Ile/Leu-DCA	Oribacterium sinus	0	0	0	0	0
Ile/Leu-DCA	Parabacteroides	0	0	0	0	0
Ile/Leu-DCA	Parabacteroides goldsteinii	0	0	0	0	0
Ile/Leu-DCA	Parabacteroides johnsonii	0	0	0	0	0
Ile/Leu-DCA	Parabacteroides merdae	0	0	0	0	0
Ile/Leu-DCA	Parvimonas micra	0	0	0	0	0
Ile/Leu-DCA	Parvimonas sp. oral taxon 110	0	0	0	0	0
Ile/Leu-DCA	Peptoniphilus lacrimalis	0	0	0	0	0
Ile/Leu-DCA	Peptoniphilus sp. oral taxon 386	0	0	0	0	0
Ile/Leu-DCA	Peptoniphilus sp. oral taxon 836	0	0	0	0	0
Ile/Leu-DCA	Peptostreptococcus anaerobius	0	0	0	0	0
Ile/Leu-DCA	Porphyromonas sp. oral taxon 278	0	0	0	0	0
Ile/Leu-DCA	Prevotella amnii	0	0	0	0	0
Ile/Leu-DCA	Prevotella bivia	0	0	0	0	0
Ile/Leu-DCA	Prevotella buccae	0	0	0	0	0
Ile/Leu-DCA	Prevotella denticola	0	0	0	0	0
Ile/Leu-DCA	Prevotella disiens	0	0	0	0	0
Ile/Leu-DCA	Prevotella histicola	0	0	0	0	0
Ile/Leu-DCA	Prevotella melaninogenica	0	0	0	0	0
Ile/Leu-DCA	Prevotella nigrescens	0	0	0	0	0
Ile/Leu-DCA	Prevotella oralis	0	0	0	0	0
Ile/Leu-DCA	Prevotella oris	0	0	0	0	0
Ile/Leu-DCA	Prevotella sp. oral taxon 317	0	0	0	0	0
Ile/Leu-DCA	Prevotella sp. oral taxon 472	0	0	0	0	0
Ile/Leu-DCA	Prevotella timonensis	0	0	0	0	0
Ile/Leu-DCA	Prevotella veroralis	0	0	0	0	0
Ile/Leu-DCA	Propionibacterium acidifaciens	0	0	0	0	0
Ile/Leu-DCA	Propionibacterium humerusii	0	0	0	0	0
Ile/Leu-DCA	Pseudopropionibacterium propionicum	0	0	0	0	0
Ile/Leu-DCA	Selenomonas noxia	0	0	0	0	0
Ile/Leu-DCA	Sutterella wadsworthensis	0	0	0	0	0
Ile/Leu-DCA	Treponema denticola	0	0	0	0	0
Ile/Leu-DCA	unclassified Peptostreptococcaceae (miscellaneous)	0	0	0	0	0
Ile/Leu-DCA	Veillonella montpellierensis	0	0	0	0	0
Lys-CA	Actinomyces viscosus	0	0	0	0	0
Lys-CA	Bacteroides caccae	0	0	0	0	0
Lys-CA	Bacteroides cellulosilyticus	0	0	0	0	0
Lys-CA	Bacteroides dorei	0	0	0	0	0
Lys-CA	Bacteroides eggerthii	0	0	0	0	0
Lys-CA	Bacteroides finegoldii	0	0	0	0	0
Lys-CA	Bacteroides fragilis	0	0	0	0	0
Lys-CA	Bacteroides ovatus	0	0	0	0	0
Lys-CA	Bacteroides salyersiae	0	0	0	0	0
Lys-CA	Bacteroides stercoris	0	0	0	0	0
Lys-CA	Bacteroides vulgatus	0	0	0	0	0
Lys-CA	Bifidobacterium adolescentis	6516.358	4541.408	7107.866	0	3944.079157
Lys-CA	Bifidobacterium angulatum	0	10393.74433	31181.233	0	18002.49327
Lys-CA	Bifidobacterium breve	0	5234.864917	25841.896	0	9413.541257
Lys-CA	Bifidobacterium longum	0	987.68575	7109.009	0	2361.237488
Lys-CA	Catabacter hongkongensis	0	0	0	0	0
Lys-CA	Cellulosilyticum lentocellum	0	0	0	0	0
Lys-CA	Clostridiales bacterium oral taxon 876	0	0	0	0	0
Lys-CA	Clostridium aldenense	0	0	0	0	0
Lys-CA	Clostridium cadaveris	0	0	0	0	0
Lys-CA	Clostridium symbiosum	0	0	0	0	0
Lys-CA	Cutibacterium acnes	0	0	0	0	0
Lys-CA	Enterococcus faecalis	0	0	0	0	0
Lys-CA	Enterococcus faecium	0	209.8403333	4406.647	0	961.6092114
Lys-CA	Finegoldia magna	0	0	0	0	0
Lys-CA	Flavonifractor plautii	0	0	0	0	0
Lys-CA	Fusobacterium nucleatum	0	0	0	0	0
Lys-CA	Fusobacterium periodonticum	0	0	0	0	0
Lys-CA	Fusobacterium ulcerans	0	0	0	0	0
Lys-CA	Gardnerella vaginalis	0	0	0	0	0
Lys-CA	Lachnospiraceae bacterium oral taxon 500	0	1372.656	4117.968	0	2377.509933
Lys-CA	Lactobacillus gasseri	0	0	0	0	0
Lys-CA	Lactobacillus jensenii	0	0	0	0	0
Lys-CA	Lactobacillus vaginalis	0	0	0	0	0
Lys-CA	Mobiluncus mulieris	0	0	0	0	0
Lys-CA	Olsenella sp. oral taxon 809	0	0	0	0	0
Lys-CA	Oribacterium sinus	0	0	0	0	0
Lys-CA	Parabacteroides	0	0	0	0	0
Lys-CA	Parabacteroides goldsteinii	0	0	0	0	0
Lys-CA	Parabacteroides johnsonii	0	0	0	0	0
Lys-CA	Parabacteroides merdae	0	0	0	0	0
Lys-CA	Parvimonas micra	0	0	0	0	0
Lys-CA	Parvimonas sp. oral taxon 110	0	0	0	0	0
Lys-CA	Peptoniphilus lacrimalis	0	0	0	0	0
Lys-CA	Peptoniphilus sp. oral taxon 386	0	0	0	0	0
Lys-CA	Peptoniphilus sp. oral taxon 836	0	0	0	0	0
Lys-CA	Peptostreptococcus anaerobius	0	0	0	0	0
Lys-CA	Porphyromonas sp. oral taxon 278	0	0	0	0	0
Lys-CA	Prevotella amnii	0	0	0	0	0
Lys-CA	Prevotella bivia	0	0	0	0	0
Lys-CA	Prevotella buccae	0	0	0	0	0
Lys-CA	Prevotella denticola	0	0	0	0	0
Lys-CA	Prevotella disiens	0	0	0	0	0
Lys-CA	Prevotella histicola	0	0	0	0	0
Lys-CA	Prevotella melaninogenica	0	0	0	0	0
Lys-CA	Prevotella nigrescens	0	0	0	0	0
Lys-CA	Prevotella oralis	0	0	0	0	0
Lys-CA	Prevotella oris	0	0	0	0	0
Lys-CA	Prevotella sp. oral taxon 317	0	0	0	0	0
Lys-CA	Prevotella sp. oral taxon 472	0	0	0	0	0
Lys-CA	Prevotella timonensis	0	0	0	0	0
Lys-CA	Prevotella veroralis	0	0	0	0	0
Lys-CA	Propionibacterium acidifaciens	0	0	0	0	0
Lys-CA	Propionibacterium humerusii	0	0	0	0	0
Lys-CA	Pseudopropionibacterium propionicum	0	0	0	0	0
Lys-CA	Selenomonas noxia	0	0	0	0	0
Lys-CA	Sutterella wadsworthensis	0	0	0	0	0
Lys-CA	Treponema denticola	0	0	0	0	0
Lys-CA	unclassified Peptostreptococcaceae (miscellaneous)	0	0	0	0	0
Lys-CA	Veillonella montpellierensis	0	0	0	0	0
Lys-DCA	Actinomyces viscosus	0	0	0	0	0
Lys-DCA	Bacteroides caccae	0	0	0	0	0
Lys-DCA	Bacteroides cellulosilyticus	0	0	0	0	0
Lys-DCA	Bacteroides dorei	0	0	0	0	0
Lys-DCA	Bacteroides eggerthii	0	0	0	0	0
Lys-DCA	Bacteroides finegoldii	0	0	0	0	0
Lys-DCA	Bacteroides fragilis	0	0	0	0	0
Lys-DCA	Bacteroides ovatus	0	0	0	0	0
Lys-DCA	Bacteroides salyersiae	0	0	0	0	0
Lys-DCA	Bacteroides stercoris	0	0	0	0	0
Lys-DCA	Bacteroides vulgatus	0	0	0	0	0
Lys-DCA	Bifidobacterium adolescentis	11690.874	10128.519	18694.683	0	9444.760875
Lys-DCA	Bifidobacterium angulatum	8863.532	7179.974667	12676.392	0	6503.729892
Lys-DCA	Bifidobacterium breve	6968.92	9808.398	30903.574	0	11124.03909
Lys-DCA	Bifidobacterium longum	0	2810.054917	12139.362	0	4018.141138
Lys-DCA	Catabacter hongkongensis	14919.394	10123.019	15449.663	0	8770.799938
Lys-DCA	Cellulosilyticum lentocellum	25662.202	17416.448	26587.142	0	15090.17476
Lys-DCA	Clostridiales bacterium oral taxon 876	15710.92	11374.67	18413.09	0	9942.975857
Lys-DCA	Clostridium aldenense	0	0	0	0	0
Lys-DCA	Clostridium cadaveris	0	8277.902833	25908.241	0	12842.06638
Lys-DCA	Clostridium symbiosum	0	0	0	0	0
Lys-DCA	Cutibacterium acnes	0	0	0	0	0
Lys-DCA	Enterococcus faecalis	0	0	0	0	0
Lys-DCA	Enterococcus faecium	7406.371	11194.56457	48207.337	0	14043.84466
Lys-DCA	Finegoldia magna	0	0	0	0	0
Lys-DCA	Flavonifractor plautii	0	0	0	0	0
Lys-DCA	Fusobacterium nucleatum	0	3141.738467	23971.884	0	8292.46675
Lys-DCA	Fusobacterium periodonticum	0	0	0	0	0
Lys-DCA	Fusobacterium ulcerans	0	0	0	0	0
Lys-DCA	Gardnerella vaginalis	0	0	0	0	0
Lys-DCA	Lachnospiraceae bacterium oral taxon 500	28504.645	21962.85567	37383.922	0	19531.65794
Lys-DCA	Lactobacillus gasseri	0	0	0	0	0
Lys-DCA	Lactobacillus jensenii	0	0	0	0	0
Lys-DCA	Lactobacillus vaginalis	0	0	0	0	0
Lys-DCA	Mobiluncus mulieris	0	0	0	0	0
Lys-DCA	Olsenella sp. oral taxon 809	0	0	0	0	0
Lys-DCA	Oribacterium sinus	0	0	0	0	0
Lys-DCA	Parabacteroides	0	0	0	0	0
Lys-DCA	Parabacteroides goldsteinii	0	0	0	0	0
Lys-DCA	Parabacteroides johnsonii	0	0	0	0	0
Lys-DCA	Parabacteroides merdae	0	0	0	0	0
Lys-DCA	Parvimonas micra	0	0	0	0	0
Lys-DCA	Parvimonas sp. oral taxon 110	0	0	0	0	0
Lys-DCA	Peptoniphilus lacrimalis	0	0	0	0	0
Lys-DCA	Peptoniphilus sp. oral taxon 386	0	0	0	0	0
Lys-DCA	Peptoniphilus sp. oral taxon 836	0	0	0	0	0
Lys-DCA	Peptostreptococcus anaerobius	0	0	0	0	0
Lys-DCA	Porphyromonas sp. oral taxon 278	0	0	0	0	0
Lys-DCA	Prevotella amnii	0	0	0	0	0
Lys-DCA	Prevotella bivia	0	0	0	0	0
Lys-DCA	Prevotella buccae	0	0	0	0	0
Lys-DCA	Prevotella denticola	0	0	0	0	0
Lys-DCA	Prevotella disiens	0	0	0	0	0
Lys-DCA	Prevotella histicola	0	0	0	0	0
Lys-DCA	Prevotella melaninogenica	0	0	0	0	0
Lys-DCA	Prevotella nigrescens	0	0	0	0	0
Lys-DCA	Prevotella oralis	0	0	0	0	0
Lys-DCA	Prevotella oris	0	0	0	0	0
Lys-DCA	Prevotella sp. oral taxon 317	0	0	0	0	0
Lys-DCA	Prevotella sp. oral taxon 472	0	0	0	0	0
Lys-DCA	Prevotella timonensis	0	0	0	0	0
Lys-DCA	Prevotella veroralis	0	0	0	0	0
Lys-DCA	Propionibacterium acidifaciens	0	0	0	0	0
Lys-DCA	Propionibacterium humerusii	0	0	0	0	0
Lys-DCA	Pseudopropionibacterium propionicum	0	0	0	0	0
Lys-DCA	Selenomonas noxia	0	0	0	0	0
Lys-DCA	Sutterella wadsworthensis	0	0	0	0	0
Lys-DCA	Treponema denticola	0	0	0	0	0
Lys-DCA	unclassified Peptostreptococcaceae (miscellaneous)	0	0	0	0	0
Lys-DCA	Veillonella montpellierensis	0	0	0	0	0
Met-DCA	Actinomyces viscosus	0	0	0	0	0
Met-DCA	Bacteroides caccae	0	0	0	0	0
Met-DCA	Bacteroides cellulosilyticus	0	0	0	0	0
Met-DCA	Bacteroides dorei	0	0	0	0	0
Met-DCA	Bacteroides eggerthii	0	0	0	0	0
Met-DCA	Bacteroides finegoldii	0	0	0	0	0
Met-DCA	Bacteroides fragilis	0	0	0	0	0
Met-DCA	Bacteroides ovatus	0	0	0	0	0
Met-DCA	Bacteroides salyersiae	0	0	0	0	0
Met-DCA	Bacteroides stercoris	0	0	0	0	0
Met-DCA	Bacteroides vulgatus	0	0	0	0	0
Met-DCA	Bifidobacterium adolescentis	0	0	0	0	0
Met-DCA	Bifidobacterium angulatum	0	0	0	0	0
Met-DCA	Bifidobacterium breve	0	0	0	0	0
Met-DCA	Bifidobacterium longum	0	0	0	0	0
Met-DCA	Catabacter hongkongensis	0	0	0	0	0
Met-DCA	Cellulosilyticum lentocellum	8546.946	6267.441667	10255.379	0	5494.570467
Met-DCA	Clostridiales bacterium oral taxon 876	0	0	0	0	0
Met-DCA	Clostridium aldenense	0	0	0	0	0
Met-DCA	Clostridium cadaveris	0	0	0	0	0
Met-DCA	Clostridium symbiosum	8762.879	6873.049333	11856.269	0	6149.908193
Met-DCA	Cutibacterium acnes	0	0	0	0	0
Met-DCA	Enterococcus faecalis	0	0	0	0	0
Met-DCA	Enterococcus faecium	0	4784.457333	17663.104	0	5919.957579
Met-DCA	Finegoldia magna	0	0	0	0	0
Met-DCA	Flavonifractor plautii	0	0	0	0	0
Met-DCA	Fusobacterium nucleatum	0	869.7049333	6618.188	0	2295.428736
Met-DCA	Fusobacterium periodonticum	0	0	0	0	0
Met-DCA	Fusobacterium ulcerans	0	0	0	0	0
Met-DCA	Gardnerella vaginalis	0	0	0	0	0
Met-DCA	Lachnospiraceae bacterium oral taxon 500	7345.466	5791.423	10028.803	0	5191.869571
Met-DCA	Lactobacillus gasseri	0	0	0	0	0
Met-DCA	Lactobacillus jensenii	0	0	0	0	0
Met-DCA	Lactobacillus vaginalis	0	0	0	0	0
Met-DCA	Mobiluncus mulieris	0	0	0	0	0
Met-DCA	Olsenella sp. oral taxon 809	0	0	0	0	0
Met-DCA	Oribacterium sinus	0	0	0	0	0
Met-DCA	Parabacteroides	0	0	0	0	0
Met-DCA	Parabacteroides goldsteinii	0	0	0	0	0
Met-DCA	Parabacteroides johnsonii	0	0	0	0	0
Met-DCA	Parabacteroides merdae	0	0	0	0	0
Met-DCA	Parvimonas micra	0	0	0	0	0
Met-DCA	Parvimonas sp. oral taxon 110	0	0	0	0	0
Met-DCA	Peptoniphilus lacrimalis	0	0	0	0	0
Met-DCA	Peptoniphilus sp. oral taxon 386	0	0	0	0	0
Met-DCA	Peptoniphilus sp. oral taxon 836	0	0	0	0	0
Met-DCA	Peptostreptococcus anaerobius	0	0	0	0	0
Met-DCA	Porphyromonas sp. oral taxon 278	0	0	0	0	0
Met-DCA	Prevotella amnii	0	0	0	0	0
Met-DCA	Prevotella bivia	0	0	0	0	0
Met-DCA	Prevotella buccae	0	0	0	0	0
Met-DCA	Prevotella denticola	0	0	0	0	0
Met-DCA	Prevotella disiens	0	0	0	0	0
Met-DCA	Prevotella histicola	0	0	0	0	0
Met-DCA	Prevotella melaninogenica	0	0	0	0	0
Met-DCA	Prevotella nigrescens	0	0	0	0	0
Met-DCA	Prevotella oralis	0	0	0	0	0
Met-DCA	Prevotella oris	0	0	0	0	0
Met-DCA	Prevotella sp. oral taxon 317	0	0	0	0	0
Met-DCA	Prevotella sp. oral taxon 472	0	0	0	0	0
Met-DCA	Prevotella timonensis	0	0	0	0	0
Met-DCA	Prevotella veroralis	0	0	0	0	0
Met-DCA	Propionibacterium acidifaciens	0	0	0	0	0
Met-DCA	Propionibacterium humerusii	0	0	0	0	0
Met-DCA	Pseudopropionibacterium propionicum	0	0	0	0	0
Met-DCA	Selenomonas noxia	0	0	0	0	0
Met-DCA	Sutterella wadsworthensis	0	0	0	0	0
Met-DCA	Treponema denticola	0	0	0	0	0
Met-DCA	unclassified Peptostreptococcaceae (miscellaneous)	0	0	0	0	0
Met-DCA	Veillonella montpellierensis	0	0	0	0	0
Orn-DCA	Actinomyces viscosus	0	0	0	0	0
Orn-DCA	Bacteroides caccae	0	0	0	0	0
Orn-DCA	Bacteroides cellulosilyticus	0	0	0	0	0
Orn-DCA	Bacteroides dorei	0	0	0	0	0
Orn-DCA	Bacteroides eggerthii	0	0	0	0	0
Orn-DCA	Bacteroides finegoldii	0	0	0	0	0
Orn-DCA	Bacteroides fragilis	0	0	0	0	0
Orn-DCA	Bacteroides ovatus	0	0	0	0	0
Orn-DCA	Bacteroides salyersiae	0	0	0	0	0
Orn-DCA	Bacteroides stercoris	0	0	0	0	0
Orn-DCA	Bacteroides vulgatus	0	0	0	0	0
Orn-DCA	Bifidobacterium adolescentis	0	0	0	0	0
Orn-DCA	Bifidobacterium angulatum	0	0	0	0	0
Orn-DCA	Bifidobacterium breve	0	0	0	0	0
Orn-DCA	Bifidobacterium longum	0	0	0	0	0
Orn-DCA	Catabacter hongkongensis	0	0	0	0	0
Orn-DCA	Cellulosilyticum lentocellum	0	2497.670333	7493.011	0	4326.091918
Orn-DCA	Clostridiales bacterium oral taxon 876	0	0	0	0	0
Orn-DCA	Clostridium aldenense	0	0	0	0	0
Orn-DCA	Clostridium cadaveris	0	0	0	0	0
Orn-DCA	Clostridium symbiosum	0	0	0	0	0
Orn-DCA	Cutibacterium acnes	0	0	0	0	0
Orn-DCA	Enterococcus faecalis	0	0	0	0	0
Orn-DCA	Enterococcus faecium	0	1924.539333	16281.917	0	4457.901904
Orn-DCA	Finegoldia magna	0	0	0	0	0
Orn-DCA	Flavonifractor plautii	0	0	0	0	0
Orn-DCA	Fusobacterium nucleatum	0	681.2092	5128.033	0	1797.720814
Orn-DCA	Fusobacterium periodonticum	0	0	0	0	0
Orn-DCA	Fusobacterium ulcerans	0	0	0	0	0
Orn-DCA	Gardnerella vaginalis	0	0	0	0	0
Orn-DCA	Lachnospiraceae bacterium oral taxon 500	5554.656	5420.433	10706.643	0	5354.583358
Orn-DCA	Lactobacillus gasseri	0	0	0	0	0
Orn-DCA	Lactobacillus jensenii	0	0	0	0	0
Orn-DCA	Lactobacillus vaginalis	0	0	0	0	0
Orn-DCA	Mobiluncus mulieris	0	0	0	0	0
Orn-DCA	Olsenella sp. oral taxon 809	0	0	0	0	0
Orn-DCA	Oribacterium sinus	0	0	0	0	0
Orn-DCA	Parabacteroides	0	0	0	0	0
Orn-DCA	Parabacteroides goldsteinii	0	0	0	0	0
Orn-DCA	Parabacteroides johnsonii	0	0	0	0	0
Orn-DCA	Parabacteroides merdae	0	0	0	0	0
Orn-DCA	Parvimonas micra	0	0	0	0	0
Orn-DCA	Parvimonas sp. oral taxon 110	0	0	0	0	0
Orn-DCA	Peptoniphilus lacrimalis	0	0	0	0	0
Orn-DCA	Peptoniphilus sp. oral taxon 386	0	0	0	0	0
Orn-DCA	Peptoniphilus sp. oral taxon 836	0	0	0	0	0
Orn-DCA	Peptostreptococcus anaerobius	0	0	0	0	0
Orn-DCA	Porphyromonas sp. oral taxon 278	0	0	0	0	0
Orn-DCA	Prevotella amnii	0	0	0	0	0
Orn-DCA	Prevotella bivia	0	0	0	0	0
Orn-DCA	Prevotella buccae	0	0	0	0	0
Orn-DCA	Prevotella denticola	0	0	0	0	0
Orn-DCA	Prevotella disiens	0	0	0	0	0
Orn-DCA	Prevotella histicola	0	0	0	0	0
Orn-DCA	Prevotella melaninogenica	0	0	0	0	0
Orn-DCA	Prevotella nigrescens	0	0	0	0	0
Orn-DCA	Prevotella oralis	0	0	0	0	0
Orn-DCA	Prevotella oris	0	0	0	0	0
Orn-DCA	Prevotella sp. oral taxon 317	0	0	0	0	0
Orn-DCA	Prevotella sp. oral taxon 472	0	0	0	0	0
Orn-DCA	Prevotella timonensis	0	0	0	0	0
Orn-DCA	Prevotella veroralis	0	0	0	0	0
Orn-DCA	Propionibacterium acidifaciens	0	0	0	0	0
Orn-DCA	Propionibacterium humerusii	0	0	0	0	0
Orn-DCA	Pseudopropionibacterium propionicum	0	0	0	0	0
Orn-DCA	Selenomonas noxia	0	0	0	0	0
Orn-DCA	Sutterella wadsworthensis	0	0	0	0	0
Orn-DCA	Treponema denticola	0	0	0	0	0
Orn-DCA	unclassified Peptostreptococcaceae (miscellaneous)	0	0	0	0	0
Orn-DCA	Veillonella montpellierensis	0	0	0	0	0
Phe-CA	Actinomyces viscosus	0	0	0	0	0
Phe-CA	Bacteroides caccae	0	0	0	0	0
Phe-CA	Bacteroides cellulosilyticus	0	0	0	0	0
Phe-CA	Bacteroides dorei	0	0	0	0	0
Phe-CA	Bacteroides eggerthii	0	0	0	0	0
Phe-CA	Bacteroides finegoldii	0	0	0	0	0
Phe-CA	Bacteroides fragilis	0	0	0	0	0
Phe-CA	Bacteroides ovatus	0	0	0	0	0
Phe-CA	Bacteroides salyersiae	0	0	0	0	0
Phe-CA	Bacteroides stercoris	0	0	0	0	0
Phe-CA	Bacteroides vulgatus	0	0	0	0	0
Phe-CA	Bifidobacterium adolescentis	17147.978	13253.844	22613.554	0	11799.00063
Phe-CA	Bifidobacterium angulatum	4962.368	6581.748667	14782.878	0	7523.308169
Phe-CA	Bifidobacterium breve	5175.9695	4981.991167	13195.345	0	4383.787799
Phe-CA	Bifidobacterium longum	0	432.7830833	5193.397	0	1499.204578
Phe-CA	Catabacter hongkongensis	0	0	0	0	0
Phe-CA	Cellulosilyticum lentocellum	0	0	0	0	0
Phe-CA	Clostridiales bacterium oral taxon 876	0	0	0	0	0
Phe-CA	Clostridium aldenense	0	0	0	0	0
Phe-CA	Clostridium cadaveris	0	0	0	0	0
Phe-CA	Clostridium symbiosum	0	0	0	0	0
Phe-CA	Cutibacterium acnes	0	0	0	0	0
Phe-CA	Enterococcus faecalis	0	0	0	0	0
Phe-CA	Enterococcus faecium	0	1889.642286	16720.387	0	4156.798968
Phe-CA	Finegoldia magna	0	0	0	0	0
Phe-CA	Flavonifractor plautii	0	0	0	0	0
Phe-CA	Fusobacterium nucleatum	0	0	0	0	0
Phe-CA	Fusobacterium periodonticum	0	0	0	0	0
Phe-CA	Fusobacterium ulcerans	0	0	0	0	0
Phe-CA	Gardnerella vaginalis	0	0	0	0	0
Phe-CA	Lachnospiraceae bacterium oral taxon 500	0	2299.328667	6897.986	0	3982.554074
Phe-CA	Lactobacillus gasseri	0	0	0	0	0
Phe-CA	Lactobacillus jensenii	0	0	0	0	0
Phe-CA	Lactobacillus vaginalis	0	0	0	0	0
Phe-CA	Mobiluncus mulieris	0	0	0	0	0
Phe-CA	Olsenella sp. oral taxon 809	0	0	0	0	0
Phe-CA	Oribacterium sinus	0	0	0	0	0
Phe-CA	Parabacteroides	0	0	0	0	0
Phe-CA	Parabacteroides goldsteinii	0	0	0	0	0
Phe-CA	Parabacteroides johnsonii	0	0	0	0	0
Phe-CA	Parabacteroides merdae	0	0	0	0	0
Phe-CA	Parvimonas micra	0	0	0	0	0
Phe-CA	Parvimonas sp. oral taxon 110	0	0	0	0	0
Phe-CA	Peptoniphilus lacrimalis	0	0	0	0	0
Phe-CA	Peptoniphilus sp. oral taxon 386	0	0	0	0	0
Phe-CA	Peptoniphilus sp. oral taxon 836	0	0	0	0	0
Phe-CA	Peptostreptococcus anaerobius	0	0	0	0	0
Phe-CA	Porphyromonas sp. oral taxon 278	0	0	0	0	0
Phe-CA	Prevotella amnii	0	0	0	0	0
Phe-CA	Prevotella bivia	0	0	0	0	0
Phe-CA	Prevotella buccae	0	0	0	0	0
Phe-CA	Prevotella denticola	0	0	0	0	0
Phe-CA	Prevotella disiens	0	0	0	0	0
Phe-CA	Prevotella histicola	0	0	0	0	0
Phe-CA	Prevotella melaninogenica	0	0	0	0	0
Phe-CA	Prevotella nigrescens	0	0	0	0	0
Phe-CA	Prevotella oralis	0	0	0	0	0
Phe-CA	Prevotella oris	0	0	0	0	0
Phe-CA	Prevotella sp. oral taxon 317	0	0	0	0	0
Phe-CA	Prevotella sp. oral taxon 472	0	0	0	0	0
Phe-CA	Prevotella timonensis	0	0	0	0	0
Phe-CA	Prevotella veroralis	0	0	0	0	0
Phe-CA	Propionibacterium acidifaciens	0	0	0	0	0
Phe-CA	Propionibacterium humerusii	0	0	0	0	0
Phe-CA	Pseudopropionibacterium propionicum	0	0	0	0	0
Phe-CA	Selenomonas noxia	0	0	0	0	0
Phe-CA	Sutterella wadsworthensis	0	0	0	0	0
Phe-CA	Treponema denticola	0	0	0	0	0
Phe-CA	unclassified Peptostreptococcaceae (miscellaneous)	0	0	0	0	0
Phe-CA	Veillonella montpellierensis	0	0	0	0	0
Phe-DCA	Actinomyces viscosus	0	0	0	0	0
Phe-DCA	Bacteroides caccae	4554.3	3130.765	4837.995	0	2715.029986
Phe-DCA	Bacteroides cellulosilyticus	0	0	0	0	0
Phe-DCA	Bacteroides dorei	0	0	0	0	0
Phe-DCA	Bacteroides eggerthii	0	0	0	0	0
Phe-DCA	Bacteroides finegoldii	0	0	0	0	0
Phe-DCA	Bacteroides fragilis	0	672.4424	5889.44	0	1803.15747
Phe-DCA	Bacteroides ovatus	0	0	0	0	0
Phe-DCA	Bacteroides salyersiae	0	0	0	0	0
Phe-DCA	Bacteroides stercoris	0	0	0	0	0
Phe-DCA	Bacteroides vulgatus	0	0	0	0	0
Phe-DCA	Bifidobacterium adolescentis	16100.144	11961.11333	19783.196	0	10521.0452
Phe-DCA	Bifidobacterium angulatum	6421.692	11184.72867	27132.494	0	14179.49034
Phe-DCA	Bifidobacterium breve	5775.1435	6116.948833	26256.209	0	7684.458039
Phe-DCA	Bifidobacterium longum	2062.197	2643.6185	6518.768	0	2836.530708
Phe-DCA	Catabacter hongkongensis	8140.209	6653.015667	11818.838	0	6048.143593
Phe-DCA	Cellulosilyticum lentocellum	14206.711	12294.24367	22676.02	0	11458.34278
Phe-DCA	Clostridiales bacterium oral taxon 876	0	0	0	0	0
Phe-DCA	Clostridium aldenense	0	0	0	0	0
Phe-DCA	Clostridium cadaveris	0	2680.259167	8752.948	0	4176.597755
Phe-DCA	Clostridium symbiosum	0	0	0	0	0
Phe-DCA	Cutibacterium acnes	0	0	0	0	0
Phe-DCA	Enterococcus faecalis	0	0	0	0	0
Phe-DCA	Enterococcus faecium	11199.923	13094.99752	49501.372	0	15122.48705
Phe-DCA	Finegoldia magna	0	0	0	0	0
Phe-DCA	Flavonifractor plautii	0	0	0	0	0
Phe-DCA	Fusobacterium nucleatum	0	1924.180867	14806.429	0	5079.878932
Phe-DCA	Fusobacterium periodonticum	0	0	0	0	0
Phe-DCA	Fusobacterium ulcerans	6748.858	5233.815667	8952.589	0	4664.625109
Phe-DCA	Gardnerella vaginalis	0	0	0	0	0
Phe-DCA	Lachnospiraceae bacterium oral taxon 500	15094.255	13942.48167	26733.19	0	13403.7606
Phe-DCA	Lactobacillus gasseri	0	0	0	0	0
Phe-DCA	Lactobacillus jensenii	0	0	0	0	0
Phe-DCA	Lactobacillus vaginalis	0	0	0	0	0
Phe-DCA	Mobiluncus mulieris	0	0	0	0	0
Phe-DCA	Olsenella sp. oral taxon 809	0	0	0	0	0
Phe-DCA	Oribacterium sinus	0	0	0	0	0
Phe-DCA	Parabacteroides	0	0	0	0	0
Phe-DCA	Parabacteroides goldsteinii	0	0	0	0	0
Phe-DCA	Parabacteroides johnsonii	0	0	0	0	0
Phe-DCA	Parabacteroides merdae	0	0	0	0	0
Phe-DCA	Parvimonas micra	0	0	0	0	0
Phe-DCA	Parvimonas sp. oral taxon 110	0	0	0	0	0
Phe-DCA	Peptoniphilus lacrimalis	0	0	0	0	0
Phe-DCA	Peptoniphilus sp. oral taxon 386	0	0	0	0	0
Phe-DCA	Peptoniphilus sp. oral taxon 836	0	0	0	0	0
Phe-DCA	Peptostreptococcus anaerobius	0	0	0	0	0
Phe-DCA	Porphyromonas sp. oral taxon 278	0	0	0	0	0
Phe-DCA	Prevotella amnii	0	0	0	0	0
Phe-DCA	Prevotella bivia	0	0	0	0	0
Phe-DCA	Prevotella buccae	0	0	0	0	0
Phe-DCA	Prevotella denticola	0	0	0	0	0
Phe-DCA	Prevotella disiens	0	0	0	0	0
Phe-DCA	Prevotella histicola	0	0	0	0	0
Phe-DCA	Prevotella melaninogenica	0	0	0	0	0
Phe-DCA	Prevotella nigrescens	0	0	0	0	0
Phe-DCA	Prevotella oralis	0	0	0	0	0
Phe-DCA	Prevotella oris	0	0	0	0	0
Phe-DCA	Prevotella sp. oral taxon 317	0	0	0	0	0
Phe-DCA	Prevotella sp. oral taxon 472	0	0	0	0	0
Phe-DCA	Prevotella timonensis	0	0	0	0	0
Phe-DCA	Prevotella veroralis	0	0	0	0	0
Phe-DCA	Propionibacterium acidifaciens	0	0	0	0	0
Phe-DCA	Propionibacterium humerusii	0	0	0	0	0
Phe-DCA	Pseudopropionibacterium propionicum	0	0	0	0	0
Phe-DCA	Selenomonas noxia	0	0	0	0	0
Phe-DCA	Sutterella wadsworthensis	0	0	0	0	0
Phe-DCA	Treponema denticola	0	0	0	0	0
Phe-DCA	unclassified Peptostreptococcaceae (miscellaneous)	0	0	0	0	0
Phe-DCA	Veillonella montpellierensis	0	0	0	0	0
Ser-CA	Actinomyces viscosus	0	0	0	0	0
Ser-CA	Bacteroides caccae	0	0	0	0	0
Ser-CA	Bacteroides cellulosilyticus	0	0	0	0	0
Ser-CA	Bacteroides dorei	0	0	0	0	0
Ser-CA	Bacteroides eggerthii	0	0	0	0	0
Ser-CA	Bacteroides finegoldii	0	0	0	0	0
Ser-CA	Bacteroides fragilis	0	0	0	0	0
Ser-CA	Bacteroides ovatus	0	0	0	0	0
Ser-CA	Bacteroides salyersiae	0	0	0	0	0
Ser-CA	Bacteroides stercoris	0	0	0	0	0
Ser-CA	Bacteroides vulgatus	0	0	0	0	0
Ser-CA	Bifidobacterium adolescentis	0	0	0	0	0
Ser-CA	Bifidobacterium angulatum	0	1535.722	4607.166	0	2659.94853
Ser-CA	Bifidobacterium breve	0	376.679	4520.148	0	1304.854332
Ser-CA	Bifidobacterium longum	0	0	0	0	0
Ser-CA	Catabacter hongkongensis	0	0	0	0	0
Ser-CA	Cellulosilyticum lentocellum	0	0	0	0	0
Ser-CA	Clostridiales bacterium oral taxon 876	0	0	0	0	0
Ser-CA	Clostridium aldenense	0	0	0	0	0
Ser-CA	Clostridium cadaveris	0	6639.435333	22247.716	0	10390.74127
Ser-CA	Clostridium symbiosum	0	0	0	0	0
Ser-CA	Cutibacterium acnes	0	0	0	0	0
Ser-CA	Enterococcus faecalis	0	0	0	0	0
Ser-CA	Enterococcus faecium	0	0	0	0	0
Ser-CA	Finegoldia magna	0	0	0	0	0
Ser-CA	Flavonifractor plautii	0	0	0	0	0
Ser-CA	Fusobacterium nucleatum	0	0	0	0	0
Ser-CA	Fusobacterium periodonticum	0	0	0	0	0
Ser-CA	Fusobacterium ulcerans	0	0	0	0	0
Ser-CA	Gardnerella vaginalis	0	0	0	0	0
Ser-CA	Lachnospiraceae bacterium oral taxon 500	0	0	0	0	0
Ser-CA	Lactobacillus gasseri	0	0	0	0	0
Ser-CA	Lactobacillus jensenii	0	0	0	0	0
Ser-CA	Lactobacillus vaginalis	0	0	0	0	0
Ser-CA	Mobiluncus mulieris	0	0	0	0	0
Ser-CA	Olsenella sp. oral taxon 809	0	0	0	0	0
Ser-CA	Oribacterium sinus	0	0	0	0	0
Ser-CA	Parabacteroides	0	0	0	0	0
Ser-CA	Parabacteroides goldsteinii	0	0	0	0	0
Ser-CA	Parabacteroides johnsonii	0	0	0	0	0
Ser-CA	Parabacteroides merdae	0	0	0	0	0
Ser-CA	Parvimonas micra	0	0	0	0	0
Ser-CA	Parvimonas sp. oral taxon 110	0	0	0	0	0
Ser-CA	Peptoniphilus lacrimalis	0	0	0	0	0
Ser-CA	Peptoniphilus sp. oral taxon 386	0	0	0	0	0
Ser-CA	Peptoniphilus sp. oral taxon 836	0	0	0	0	0
Ser-CA	Peptostreptococcus anaerobius	0	0	0	0	0
Ser-CA	Porphyromonas sp. oral taxon 278	0	0	0	0	0
Ser-CA	Prevotella amnii	0	0	0	0	0
Ser-CA	Prevotella bivia	0	0	0	0	0
Ser-CA	Prevotella buccae	0	0	0	0	0
Ser-CA	Prevotella denticola	0	0	0	0	0
Ser-CA	Prevotella disiens	0	0	0	0	0
Ser-CA	Prevotella histicola	0	0	0	0	0
Ser-CA	Prevotella melaninogenica	0	0	0	0	0
Ser-CA	Prevotella nigrescens	0	0	0	0	0
Ser-CA	Prevotella oralis	0	0	0	0	0
Ser-CA	Prevotella oris	0	0	0	0	0
Ser-CA	Prevotella sp. oral taxon 317	0	0	0	0	0
Ser-CA	Prevotella sp. oral taxon 472	0	0	0	0	0
Ser-CA	Prevotella timonensis	0	0	0	0	0
Ser-CA	Prevotella veroralis	0	0	0	0	0
Ser-CA	Propionibacterium acidifaciens	0	0	0	0	0
Ser-CA	Propionibacterium humerusii	0	0	0	0	0
Ser-CA	Pseudopropionibacterium propionicum	0	0	0	0	0
Ser-CA	Selenomonas noxia	0	0	0	0	0
Ser-CA	Sutterella wadsworthensis	0	0	0	0	0
Ser-CA	Treponema denticola	0	0	0	0	0
Ser-CA	unclassified Peptostreptococcaceae (miscellaneous)	0	0	0	0	0
Ser-CA	Veillonella montpellierensis	0	0	0	0	0
Ser-DCA	Actinomyces viscosus	0	0	0	0	0
Ser-DCA	Bacteroides caccae	0	0	0	0	0
Ser-DCA	Bacteroides cellulosilyticus	0	0	0	0	0
Ser-DCA	Bacteroides dorei	0	0	0	0	0
Ser-DCA	Bacteroides eggerthii	0	0	0	0	0
Ser-DCA	Bacteroides finegoldii	0	0	0	0	0
Ser-DCA	Bacteroides fragilis	0	0	0	0	0
Ser-DCA	Bacteroides ovatus	0	0	0	0	0
Ser-DCA	Bacteroides salyersiae	0	0	0	0	0
Ser-DCA	Bacteroides stercoris	0	0	0	0	0
Ser-DCA	Bacteroides vulgatus	0	0	0	0	0
Ser-DCA	Bifidobacterium adolescentis	0	0	0	0	0
Ser-DCA	Bifidobacterium angulatum	0	0	0	0	0
Ser-DCA	Bifidobacterium breve	0	0	0	0	0
Ser-DCA	Bifidobacterium longum	0	0	0	0	0
Ser-DCA	Catabacter hongkongensis	0	2070.064	6210.192	0	3585.456023
Ser-DCA	Cellulosilyticum lentocellum	0	1565.490333	4696.471	0	2711.508796
Ser-DCA	Clostridiales bacterium oral taxon 876	0	0	0	0	0
Ser-DCA	Clostridium aldenense	0	0	0	0	0
Ser-DCA	Clostridium cadaveris	0	5162.703	16342.286	0	8016.249296
Ser-DCA	Clostridium symbiosum	0	0	0	0	0
Ser-DCA	Cutibacterium acnes	0	0	0	0	0
Ser-DCA	Enterococcus faecalis	0	0	0	0	0
Ser-DCA	Enterococcus faecium	0	2274.779905	11065.487	0	3593.985808
Ser-DCA	Finegoldia magna	0	0	0	0	0
Ser-DCA	Flavonifractor plautii	0	0	0	0	0
Ser-DCA	Fusobacterium nucleatum	0	443.0358667	4291.947	0	1225.211001
Ser-DCA	Fusobacterium periodonticum	0	0	0	0	0
Ser-DCA	Fusobacterium ulcerans	0	0	0	0	0
Ser-DCA	Gardnerella vaginalis	0	0	0	0	0
Ser-DCA	Lachnospiraceae bacterium oral taxon 500	0	2273.766667	6821.3	0	3938.279391
Ser-DCA	Lactobacillus gasseri	0	0	0	0	0
Ser-DCA	Lactobacillus jensenii	0	0	0	0	0
Ser-DCA	Lactobacillus vaginalis	0	0	0	0	0
Ser-DCA	Mobiluncus mulieris	0	0	0	0	0
Ser-DCA	Olsenella sp. oral taxon 809	0	0	0	0	0
Ser-DCA	Oribacterium sinus	0	0	0	0	0
Ser-DCA	Parabacteroides	0	0	0	0	0
Ser-DCA	Parabacteroides goldsteinii	0	0	0	0	0
Ser-DCA	Parabacteroides johnsonii	0	0	0	0	0
Ser-DCA	Parabacteroides merdae	0	0	0	0	0
Ser-DCA	Parvimonas micra	0	0	0	0	0
Ser-DCA	Parvimonas sp. oral taxon 110	0	0	0	0	0
Ser-DCA	Peptoniphilus lacrimalis	0	0	0	0	0
Ser-DCA	Peptoniphilus sp. oral taxon 386	0	0	0	0	0
Ser-DCA	Peptoniphilus sp. oral taxon 836	0	0	0	0	0
Ser-DCA	Peptostreptococcus anaerobius	0	0	0	0	0
Ser-DCA	Porphyromonas sp. oral taxon 278	0	0	0	0	0
Ser-DCA	Prevotella amnii	0	0	0	0	0
Ser-DCA	Prevotella bivia	0	0	0	0	0
Ser-DCA	Prevotella buccae	0	0	0	0	0
Ser-DCA	Prevotella denticola	0	0	0	0	0
Ser-DCA	Prevotella disiens	0	0	0	0	0
Ser-DCA	Prevotella histicola	0	0	0	0	0
Ser-DCA	Prevotella melaninogenica	0	0	0	0	0
Ser-DCA	Prevotella nigrescens	0	0	0	0	0
Ser-DCA	Prevotella oralis	0	0	0	0	0
Ser-DCA	Prevotella oris	0	0	0	0	0
Ser-DCA	Prevotella sp. oral taxon 317	0	0	0	0	0
Ser-DCA	Prevotella sp. oral taxon 472	0	0	0	0	0
Ser-DCA	Prevotella timonensis	0	0	0	0	0
Ser-DCA	Prevotella veroralis	0	0	0	0	0
Ser-DCA	Propionibacterium acidifaciens	0	0	0	0	0
Ser-DCA	Propionibacterium humerusii	0	0	0	0	0
Ser-DCA	Pseudopropionibacterium propionicum	0	0	0	0	0
Ser-DCA	Selenomonas noxia	0	0	0	0	0
Ser-DCA	Sutterella wadsworthensis	0	0	0	0	0
Ser-DCA	Treponema denticola	0	0	0	0	0
Ser-DCA	unclassified Peptostreptococcaceae (miscellaneous)	0	0	0	0	0
Ser-DCA	Veillonella montpellierensis	0	0	0	0	0
Thr-CA	Actinomyces viscosus	0	0	0	0	0
Thr-CA	Bacteroides caccae	0	0	0	0	0
Thr-CA	Bacteroides cellulosilyticus	0	0	0	0	0
Thr-CA	Bacteroides dorei	0	0	0	0	0
Thr-CA	Bacteroides eggerthii	0	0	0	0	0
Thr-CA	Bacteroides finegoldii	0	0	0	0	0
Thr-CA	Bacteroides fragilis	0	0	0	0	0
Thr-CA	Bacteroides ovatus	0	0	0	0	0
Thr-CA	Bacteroides salyersiae	0	0	0	0	0
Thr-CA	Bacteroides stercoris	0	0	0	0	0
Thr-CA	Bacteroides vulgatus	0	0	0	0	0
Thr-CA	Bifidobacterium adolescentis	0	2033.887	6101.661	0	3522.795621
Thr-CA	Bifidobacterium angulatum	0	2416.702333	7250.107	0	4185.851228
Thr-CA	Bifidobacterium breve	0	2574.7715	7767.777	0	3258.333349
Thr-CA	Bifidobacterium longum	7052.1675	6860.36175	15720.598	0	5864.928036
Thr-CA	Catabacter hongkongensis	0	0	0	0	0
Thr-CA	Cellulosilyticum lentocellum	0	0	0	0	0
Thr-CA	Clostridiales bacterium oral taxon 876	0	0	0	0	0
Thr-CA	Clostridium aldenense	0	0	0	0	0
Thr-CA	Clostridium cadaveris	0	2969.337167	10974.366	0	4782.116694
Thr-CA	Clostridium symbiosum	0	0	0	0	0
Thr-CA	Cutibacterium acnes	0	0	0	0	0
Thr-CA	Enterococcus faecalis	0	0	0	0	0
Thr-CA	Enterococcus faecium	0	0	0	0	0
Thr-CA	Finegoldia magna	0	0	0	0	0
Thr-CA	Flavonifractor plautii	0	0	0	0	0
Thr-CA	Fusobacterium nucleatum	0	0	0	0	0
Thr-CA	Fusobacterium periodonticum	0	0	0	0	0
Thr-CA	Fusobacterium ulcerans	0	0	0	0	0
Thr-CA	Gardnerella vaginalis	0	0	0	0	0
Thr-CA	Lachnospiraceae bacterium oral taxon 500	0	0	0	0	0
Thr-CA	Lactobacillus gasseri	0	0	0	0	0
Thr-CA	Lactobacillus jensenii	0	0	0	0	0
Thr-CA	Lactobacillus vaginalis	0	0	0	0	0
Thr-CA	Mobiluncus mulieris	0	0	0	0	0
Thr-CA	Olsenella sp. oral taxon 809	0	0	0	0	0
Thr-CA	Oribacterium sinus	0	0	0	0	0
Thr-CA	Parabacteroides	0	0	0	0	0
Thr-CA	Parabacteroides goldsteinii	0	0	0	0	0
Thr-CA	Parabacteroides johnsonii	0	0	0	0	0
Thr-CA	Parabacteroides merdae	0	0	0	0	0
Thr-CA	Parvimonas micra	0	0	0	0	0
Thr-CA	Parvimonas sp. oral taxon 110	0	0	0	0	0
Thr-CA	Peptoniphilus lacrimalis	0	0	0	0	0
Thr-CA	Peptoniphilus sp. oral taxon 386	0	0	0	0	0
Thr-CA	Peptoniphilus sp. oral taxon 836	0	0	0	0	0
Thr-CA	Peptostreptococcus anaerobius	0	0	0	0	0
Thr-CA	Porphyromonas sp. oral taxon 278	0	0	0	0	0
Thr-CA	Prevotella amnii	0	0	0	0	0
Thr-CA	Prevotella bivia	0	0	0	0	0
Thr-CA	Prevotella buccae	0	0	0	0	0
Thr-CA	Prevotella denticola	0	0	0	0	0
Thr-CA	Prevotella disiens	0	0	0	0	0
Thr-CA	Prevotella histicola	0	0	0	0	0
Thr-CA	Prevotella melaninogenica	0	0	0	0	0
Thr-CA	Prevotella nigrescens	0	0	0	0	0
Thr-CA	Prevotella oralis	0	0	0	0	0
Thr-CA	Prevotella oris	0	0	0	0	0
Thr-CA	Prevotella sp. oral taxon 317	0	0	0	0	0
Thr-CA	Prevotella sp. oral taxon 472	0	0	0	0	0
Thr-CA	Prevotella timonensis	0	0	0	0	0
Thr-CA	Prevotella veroralis	0	0	0	0	0
Thr-CA	Propionibacterium acidifaciens	0	0	0	0	0
Thr-CA	Propionibacterium humerusii	0	0	0	0	0
Thr-CA	Pseudopropionibacterium propionicum	0	0	0	0	0
Thr-CA	Selenomonas noxia	0	0	0	0	0
Thr-CA	Sutterella wadsworthensis	0	0	0	0	0
Thr-CA	Treponema denticola	0	0	0	0	0
Thr-CA	unclassified Peptostreptococcaceae (miscellaneous)	0	0	0	0	0
Thr-CA	Veillonella montpellierensis	0	0	0	0	0
Thr-DCA	Actinomyces viscosus	0	0	0	0	0
Thr-DCA	Bacteroides caccae	0	0	0	0	0
Thr-DCA	Bacteroides cellulosilyticus	0	0	0	0	0
Thr-DCA	Bacteroides dorei	0	0	0	0	0
Thr-DCA	Bacteroides eggerthii	0	0	0	0	0
Thr-DCA	Bacteroides finegoldii	0	0	0	0	0
Thr-DCA	Bacteroides fragilis	0	0	0	0	0
Thr-DCA	Bacteroides ovatus	0	0	0	0	0
Thr-DCA	Bacteroides salyersiae	0	0	0	0	0
Thr-DCA	Bacteroides stercoris	0	0	0	0	0
Thr-DCA	Bacteroides vulgatus	0	0	0	0	0
Thr-DCA	Bifidobacterium adolescentis	0	0	0	0	0
Thr-DCA	Bifidobacterium angulatum	0	0	0	0	0
Thr-DCA	Bifidobacterium breve	0	0	0	0	0
Thr-DCA	Bifidobacterium longum	2533.2075	3929.287	15562.668	0	4965.991301
Thr-DCA	Catabacter hongkongensis	0	0	0	0	0
Thr-DCA	Cellulosilyticum lentocellum	0	0	0	0	0
Thr-DCA	Clostridiales bacterium oral taxon 876	0	0	0	0	0
Thr-DCA	Clostridium aldenense	0	0	0	0	0
Thr-DCA	Clostridium cadaveris	0	10632.6075	35642.33	0	16641.33877
Thr-DCA	Clostridium symbiosum	0	0	0	0	0
Thr-DCA	Cutibacterium acnes	0	0	0	0	0
Thr-DCA	Enterococcus faecalis	0	0	0	0	0
Thr-DCA	Enterococcus faecium	0	498.6684286	5280.553	0	1575.018601
Thr-DCA	Finegoldia magna	0	0	0	0	0
Thr-DCA	Flavonifractor plautii	0	0	0	0	0
Thr-DCA	Fusobacterium nucleatum	0	0	0	0	0
Thr-DCA	Fusobacterium periodonticum	0	0	0	0	0
Thr-DCA	Fusobacterium ulcerans	0	0	0	0	0
Thr-DCA	Gardnerella vaginalis	0	0	0	0	0
Thr-DCA	Lachnospiraceae bacterium oral taxon 500	0	1550.312333	4650.937	0	2685.219729
Thr-DCA	Lactobacillus gasseri	0	0	0	0	0
Thr-DCA	Lactobacillus jensenii	0	0	0	0	0
Thr-DCA	Lactobacillus vaginalis	0	0	0	0	0
Thr-DCA	Mobiluncus mulieris	0	0	0	0	0
Thr-DCA	Olsenella sp. oral taxon 809	0	0	0	0	0
Thr-DCA	Oribacterium sinus	0	0	0	0	0
Thr-DCA	Parabacteroides	0	0	0	0	0
Thr-DCA	Parabacteroides goldsteinii	0	0	0	0	0
Thr-DCA	Parabacteroides johnsonii	0	0	0	0	0
Thr-DCA	Parabacteroides merdae	0	0	0	0	0
Thr-DCA	Parvimonas micra	0	0	0	0	0
Thr-DCA	Parvimonas sp. oral taxon 110	0	0	0	0	0
Thr-DCA	Peptoniphilus lacrimalis	0	0	0	0	0
Thr-DCA	Peptoniphilus sp. oral taxon 386	0	0	0	0	0
Thr-DCA	Peptoniphilus sp. oral taxon 836	0	0	0	0	0
Thr-DCA	Peptostreptococcus anaerobius	0	0	0	0	0
Thr-DCA	Porphyromonas sp. oral taxon 278	0	0	0	0	0
Thr-DCA	Prevotella amnii	0	0	0	0	0
Thr-DCA	Prevotella bivia	0	0	0	0	0
Thr-DCA	Prevotella buccae	0	0	0	0	0
Thr-DCA	Prevotella denticola	0	0	0	0	0
Thr-DCA	Prevotella disiens	0	0	0	0	0
Thr-DCA	Prevotella histicola	0	0	0	0	0
Thr-DCA	Prevotella melaninogenica	0	0	0	0	0
Thr-DCA	Prevotella nigrescens	0	0	0	0	0
Thr-DCA	Prevotella oralis	0	0	0	0	0
Thr-DCA	Prevotella oris	0	0	0	0	0
Thr-DCA	Prevotella sp. oral taxon 317	0	0	0	0	0
Thr-DCA	Prevotella sp. oral taxon 472	0	0	0	0	0
Thr-DCA	Prevotella timonensis	0	0	0	0	0
Thr-DCA	Prevotella veroralis	0	0	0	0	0
Thr-DCA	Propionibacterium acidifaciens	0	0	0	0	0
Thr-DCA	Propionibacterium humerusii	0	0	0	0	0
Thr-DCA	Pseudopropionibacterium propionicum	0	0	0	0	0
Thr-DCA	Selenomonas noxia	0	0	0	0	0
Thr-DCA	Sutterella wadsworthensis	0	0	0	0	0
Thr-DCA	Treponema denticola	0	0	0	0	0
Thr-DCA	unclassified Peptostreptococcaceae (miscellaneous)	0	0	0	0	0
Thr-DCA	Veillonella montpellierensis	0	0	0	0	0
Trp-DCA	Actinomyces viscosus	0	0	0	0	0
Trp-DCA	Bacteroides caccae	0	0	0	0	0
Trp-DCA	Bacteroides cellulosilyticus	0	0	0	0	0
Trp-DCA	Bacteroides dorei	0	0	0	0	0
Trp-DCA	Bacteroides eggerthii	0	0	0	0	0
Trp-DCA	Bacteroides finegoldii	0	0	0	0	0
Trp-DCA	Bacteroides fragilis	0	0	0	0	0
Trp-DCA	Bacteroides ovatus	0	0	0	0	0
Trp-DCA	Bacteroides salyersiae	0	0	0	0	0
Trp-DCA	Bacteroides stercoris	0	0	0	0	0
Trp-DCA	Bacteroides vulgatus	0	0	0	0	0
Trp-DCA	Bifidobacterium adolescentis	0	0	0	0	0
Trp-DCA	Bifidobacterium angulatum	0	0	0	0	0
Trp-DCA	Bifidobacterium breve	0	0	0	0	0
Trp-DCA	Bifidobacterium longum	0	0	0	0	0
Trp-DCA	Catabacter hongkongensis	0	0	0	0	0
Trp-DCA	Cellulosilyticum lentocellum	0	0	0	0	0
Trp-DCA	Clostridiales bacterium oral taxon 876	0	0	0	0	0
Trp-DCA	Clostridium aldenense	0	0	0	0	0
Trp-DCA	Clostridium cadaveris	0	0	0	0	0
Trp-DCA	Clostridium symbiosum	0	0	0	0	0
Trp-DCA	Cutibacterium acnes	0	0	0	0	0
Trp-DCA	Enterococcus faecalis	0	0	0	0	0
Trp-DCA	Enterococcus faecium	0	243.472381	5112.92	0	1115.730615
Trp-DCA	Finegoldia magna	0	0	0	0	0
Trp-DCA	Flavonifractor plautii	0	0	0	0	0
Trp-DCA	Fusobacterium nucleatum	0	0	0	0	0
Trp-DCA	Fusobacterium periodonticum	0	0	0	0	0
Trp-DCA	Fusobacterium ulcerans	0	0	0	0	0
Trp-DCA	Gardnerella vaginalis	0	0	0	0	0
Trp-DCA	Lachnospiraceae bacterium oral taxon 500	0	0	0	0	0
Trp-DCA	Lactobacillus gasseri	0	0	0	0	0
Trp-DCA	Lactobacillus jensenii	0	0	0	0	0
Trp-DCA	Lactobacillus vaginalis	0	0	0	0	0
Trp-DCA	Mobiluncus mulieris	0	0	0	0	0
Trp-DCA	Olsenella sp. oral taxon 809	0	0	0	0	0
Trp-DCA	Oribacterium sinus	0	0	0	0	0
Trp-DCA	Parabacteroides	0	0	0	0	0
Trp-DCA	Parabacteroides goldsteinii	0	0	0	0	0
Trp-DCA	Parabacteroides johnsonii	0	0	0	0	0
Trp-DCA	Parabacteroides merdae	0	0	0	0	0
Trp-DCA	Parvimonas micra	0	0	0	0	0
Trp-DCA	Parvimonas sp. oral taxon 110	0	0	0	0	0
Trp-DCA	Peptoniphilus lacrimalis	0	0	0	0	0
Trp-DCA	Peptoniphilus sp. oral taxon 386	0	0	0	0	0
Trp-DCA	Peptoniphilus sp. oral taxon 836	0	0	0	0	0
Trp-DCA	Peptostreptococcus anaerobius	0	0	0	0	0
Trp-DCA	Porphyromonas sp. oral taxon 278	0	0	0	0	0
Trp-DCA	Prevotella amnii	0	0	0	0	0
Trp-DCA	Prevotella bivia	0	0	0	0	0
Trp-DCA	Prevotella buccae	0	0	0	0	0
Trp-DCA	Prevotella denticola	0	0	0	0	0
Trp-DCA	Prevotella disiens	0	0	0	0	0
Trp-DCA	Prevotella histicola	0	0	0	0	0
Trp-DCA	Prevotella melaninogenica	0	0	0	0	0
Trp-DCA	Prevotella nigrescens	0	0	0	0	0
Trp-DCA	Prevotella oralis	0	0	0	0	0
Trp-DCA	Prevotella oris	0	0	0	0	0
Trp-DCA	Prevotella sp. oral taxon 317	0	0	0	0	0
Trp-DCA	Prevotella sp. oral taxon 472	0	0	0	0	0
Trp-DCA	Prevotella timonensis	0	0	0	0	0
Trp-DCA	Prevotella veroralis	0	0	0	0	0
Trp-DCA	Propionibacterium acidifaciens	0	0	0	0	0
Trp-DCA	Propionibacterium humerusii	0	0	0	0	0
Trp-DCA	Pseudopropionibacterium propionicum	0	0	0	0	0
Trp-DCA	Selenomonas noxia	0	0	0	0	0
Trp-DCA	Sutterella wadsworthensis	0	0	0	0	0
Trp-DCA	Treponema denticola	0	0	0	0	0
Trp-DCA	unclassified Peptostreptococcaceae (miscellaneous)	0	0	0	0	0
Trp-DCA	Veillonella montpellierensis	0	0	0	0	0
